# Supplementary material for: Bio-based 1,3-diisobutyl imidazolium hydrogen oxalate [iBu2IM](HC2O4) as CO2shuttle
Source: Royal Society of Chemistry journal article supplement (doi:10.1039/c7gc02167d), 2017-01-01

## **Electronic Supplementary Information**

### **Bio-based 1,3-diisobutyl imidazolium hydrogen oxalate [*i*Bu<sub>2</sub>IM](HC<sub>2</sub>O<sub>4</sub>) as CO<sub>2</sub> shuttle**

Guillaume de Robillard, Antoine H. Fournier, H el ene Cattey, Charles H. Devillers\*

and Jacques Andrieu\*

Institut de Chimie Mol culaire de l'Universit  de Bourgogne, UMR CNRS 6302, Universit  de Bourgogne Franche-Comt , 9 av. Alain Savary, 21078 DIJON, France.

E-mail: charles.devillers@u-bourgogne.fr; jacques.andrieu@u-bourgogne.fr

#### **Table of contents**

|                                                                                                   |       |
|---------------------------------------------------------------------------------------------------|-------|
| Cyclic voltammograms of [ <i>i</i> Bu <sub>2</sub> IM](HC <sub>2</sub> O <sub>4</sub> ) .....     | 2     |
| X-ray structure analyses of [ <i>i</i> Bu <sub>2</sub> IM](HC <sub>2</sub> O <sub>4</sub> ) ..... | 3     |
| X-ray structure analyses of [ <i>i</i> Bu <sub>2</sub> IM](HCO <sub>3</sub> ) .....               | 12    |
| References .....                                                                                  | 17    |
| <sup>1</sup> H- and <sup>13</sup> C-NMR spectra for imidazolium salts .....                       | 18-38 |

**Cyclic voltammograms of  $[i\text{Bu}_2\text{IM}](\text{HC}_2\text{O}_4)$ .** They were performed at RT with  $\nu = 100 \text{ mV s}^{-1}$  under argon (black line) and under  $\text{CO}_2$  bubbling (red line) in  $\text{CH}_3\text{CN}$  0.1 M  $\text{TBAPF}_6$  with  $C = 3.1 \times 10^{-2} \text{ M}$  (working electrode: glassy carbon  $\text{Ø} = 3 \text{ mm}$ , reference electrode: SCE and CE: Pt)

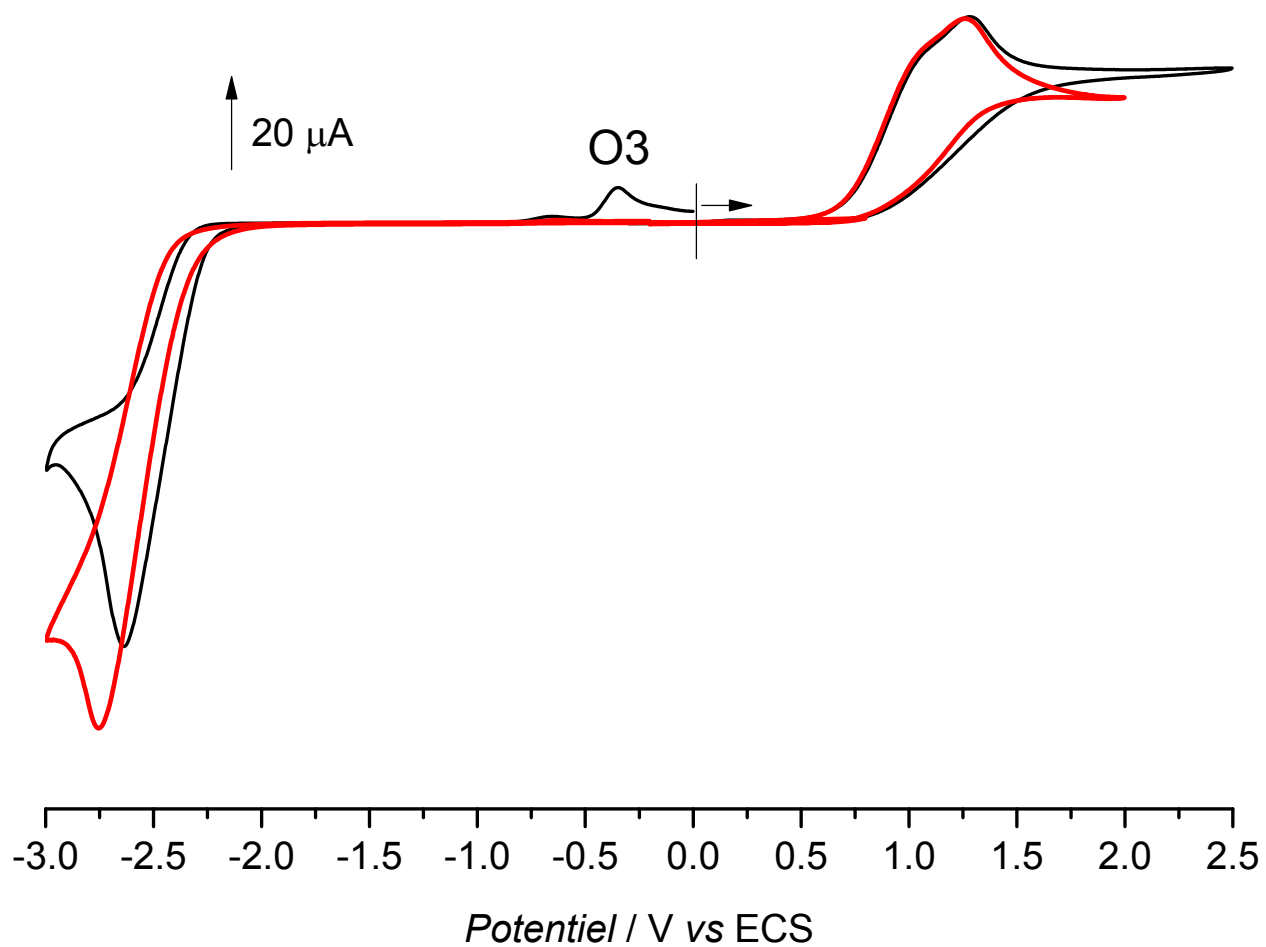

## X-ray structure analyses

X-Ray analysis of  $[i\text{Bu}_2\text{IM}](\text{HC}_2\text{O}_4)$  and  $[i\text{Bu}_2\text{IM}](\text{HCO}_3)$  compounds. Single crystals of  $[i\text{Bu}_2\text{IM}](\text{HC}_2\text{O}_4)$  were obtained from ethanol/THF mixture. A suitable crystal of  $[i\text{Bu}_2\text{IM}](\text{HC}_2\text{O}_4)$  was selected and mounted on a mylar loop with grease on a Bruker D8 VENTURE diffractometer. The crystal was kept at 100 K during data collection. A suitable crystal of  $[i\text{Bu}_2\text{IM}](\text{HCO}_3)$  was selected and mounted on a glass fibre with superglue on a Bruker APEX-II CCD diffractometer. The crystal was kept at 298 K during data collection. Data were measured using  $\phi$  and  $\omega$  scans using  $\text{MoK}_\alpha$  radiation (X-ray tube). The total number of runs and images was based on the strategy calculation from the program APEX2 (Bruker, 2014).<sup>1</sup> The structures were solved by intrinsic phasing methods (ShelXT, 2008)<sup>4</sup> and refined with full-matrix least-squares methods based on F2 (ShelXL)<sup>2</sup> with the aid of the Olex2 program.<sup>3</sup> All non-hydrogen atoms were refined with anisotropic thermal parameters. Hydrogen atoms attached to carbon atoms were included in calculated positions and refined as riding atoms. Crystal data of  $[i\text{Bu}_2\text{IM}](\text{HC}_2\text{O}_4)$  and  $[i\text{Bu}_2\text{IM}](\text{HCO}_3)$  compounds were deposited at the CCDC under the 1560697 and 1560698 reference numbers.

Crystal structure of  $[i\text{Bu}_2\text{IM}](\text{HC}_2\text{O}_4)$  – view 1 with labelled atoms

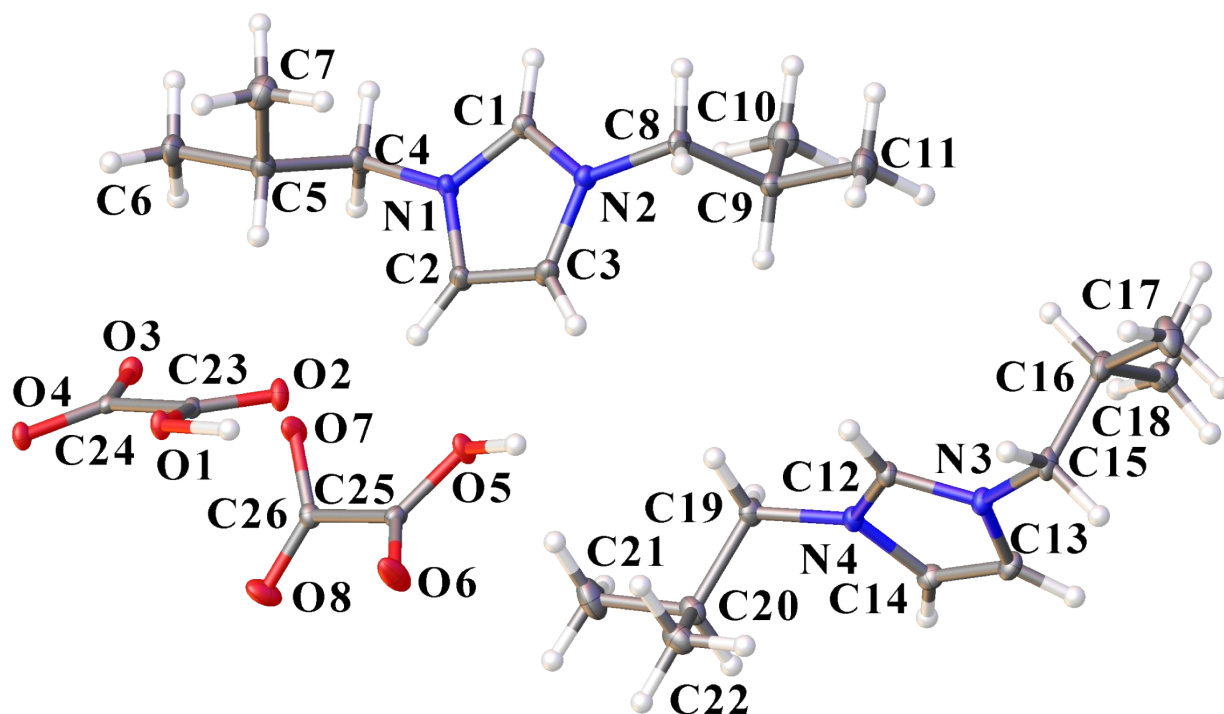

Crystal structure of  $[i\text{Bu}_2\text{IM}](\text{HC}_2\text{O}_4)$  – view 2

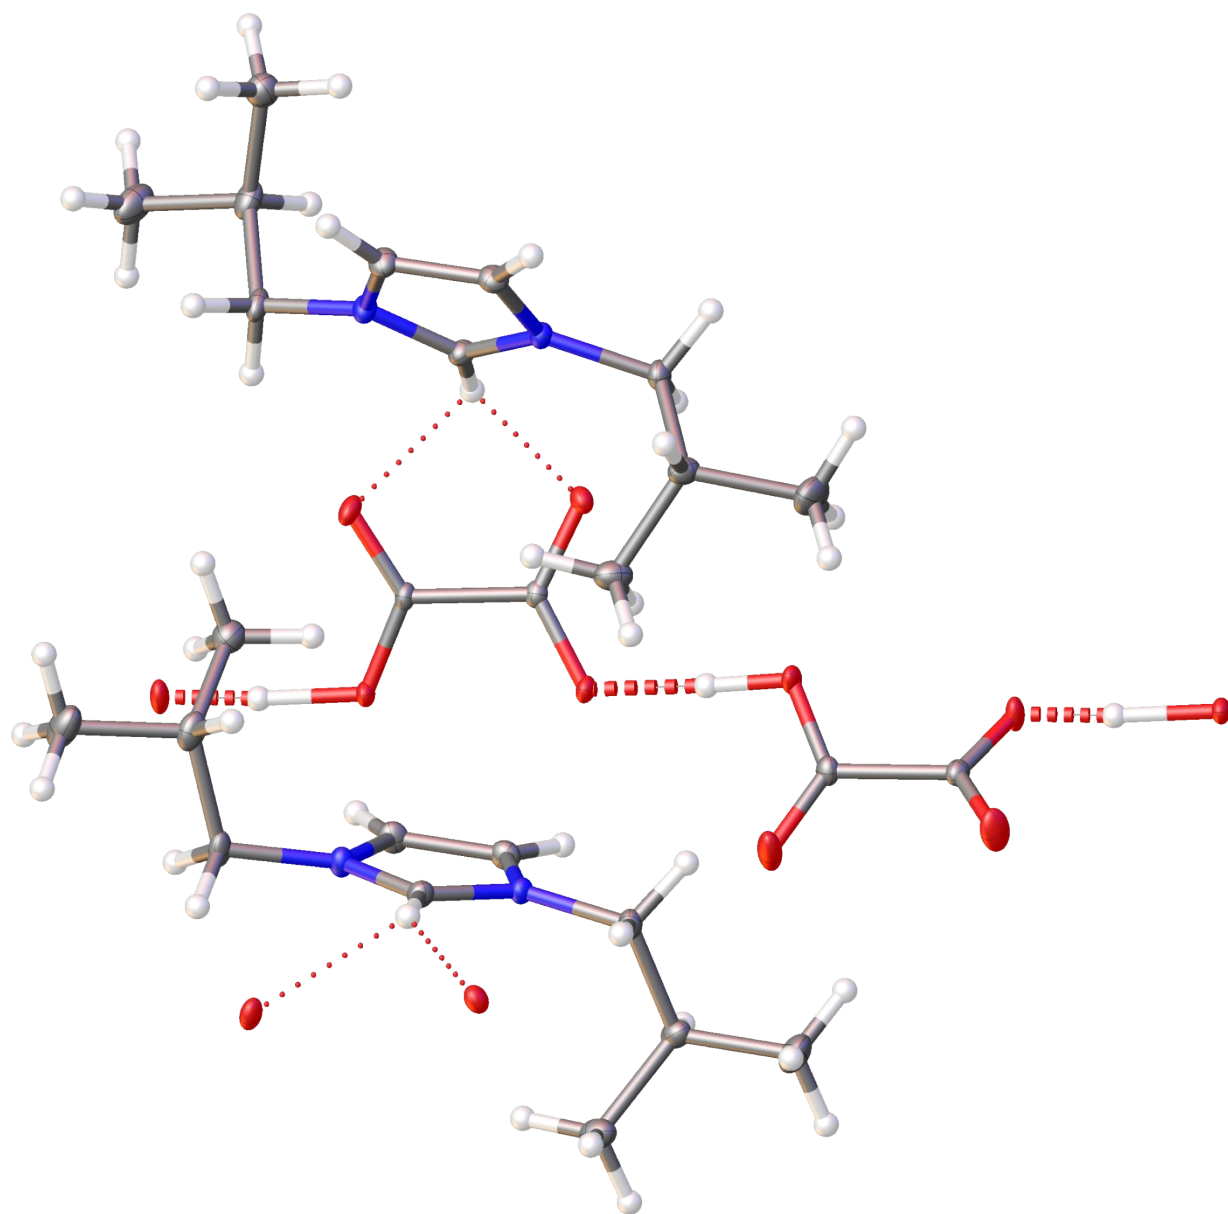

**Table 1.** Crystal data and structure refinement for [iBu<sub>2</sub>IM](HC<sub>2</sub>O<sub>4</sub>)

|                                         |                                                               |
|-----------------------------------------|---------------------------------------------------------------|
| CCDC                                    | 1560697                                                       |
| Formula                                 | C <sub>26</sub> H <sub>44</sub> N <sub>4</sub> O <sub>8</sub> |
| D <sub>calc.</sub> / g cm <sup>-3</sup> | 1.182                                                         |
| μ / mm <sup>-1</sup>                    | 0.088                                                         |
| Formula Weight                          | 540.65                                                        |
| Colour                                  | colourless                                                    |
| Shape                                   | prism                                                         |
| Size / mm <sup>3</sup>                  | 0.40 × 0.35 × 0.10                                            |
| T / K                                   | 100                                                           |
| Crystal System                          | orthorhombic                                                  |
| Space Group                             | <i>Pca</i> 2 <sub>1</sub>                                     |
| a / Å                                   | 22.5633(11)                                                   |
| b / Å                                   | 10.2111(5)                                                    |
| c / Å                                   | 13.1867(5)                                                    |
| α / °                                   | 90                                                            |
| β / °                                   | 90                                                            |
| γ / °                                   | 90                                                            |
| V = Å <sup>3</sup>                      | 3038.2(2)                                                     |
| Z                                       | 4                                                             |
| Θ <sub>min</sub> / °                    | 3.090                                                         |
| Θ <sub>max</sub> / °                    | 27.517                                                        |
| Measured Refl.                          | 55853                                                         |
| Independent Refl.                       | 6599                                                          |
| Reflections Used                        | 5365                                                          |
| R <sub>int</sub>                        | 0.0552                                                        |
| Parameters                              | 358                                                           |
| Restraints                              | 1                                                             |
| Largest Peak Largest Peak               | 0.268                                                         |
| Deepest Hole                            | -0.168                                                        |
| Goof                                    | 1.014                                                         |
| ωR <sub>2</sub> (all data)              | 0.0805                                                        |
| ωR <sub>2</sub>                         | 0.0744                                                        |
| R <sub>1</sub> (all data)               | 0.0581                                                        |
| R <sub>1</sub>                          | 0.0379                                                        |

**Table 2.** Fractional Atomic coordinates ( $\times 10^4$ ) and equivalent isotropic displacement parameters ( $\text{\AA}^2 \times 10^3$ ) for  $[\text{iBu}_2\text{IM}](\text{HC}_2\text{O}_4)$ .  $U(eq)$  is defined as one third of the trace of the orthogonalized  $U_{ij}$  tensor.

| Atom | x          | y           | z          | $U_{eq}$ |
|------|------------|-------------|------------|----------|
| C12  | 7151.1(10) | 7399(2)     | 3655.1(18) | 18.9(5)  |
| C13  | 8000.5(10) | 8049(2)     | 3003.2(18) | 22.8(5)  |
| C14  | 8033(1)    | 6743(2)     | 3135.8(17) | 21.4(5)  |
| C15  | 7208.0(11) | 9784(2)     | 3271.7(19) | 24.1(5)  |
| C16  | 6884.9(11) | 10047(2)    | 2275(2)    | 28.4(6)  |
| C17  | 6671.1(13) | 11463(3)    | 2295(2)    | 41.9(7)  |
| C18  | 7272.1(12) | 9791(2)     | 1349(2)    | 31.0(6)  |
| C19  | 7348.7(10) | 5009(2)     | 3854.0(18) | 21.4(5)  |
| C20  | 7705.3(10) | 4555(2)     | 4772.9(18) | 23.9(5)  |
| C21  | 7564.5(15) | 3105(2)     | 4950(2)    | 43.3(7)  |
| C22  | 7576.9(12) | 5382(3)     | 5705.8(19) | 31.6(6)  |
| N3   | 7447.0(8)  | 8441.8(17)  | 3328.3(14) | 19.7(4)  |
| N4   | 7496.8(8)  | 6349.7(16)  | 3545.0(14) | 18.0(4)  |
| C1   | 4972.4(10) | 2644.5(19)  | 3091.3(18) | 18.7(5)  |
| C2   | 5574.9(10) | 2217(2)     | 4367.0(17) | 22.3(5)  |
| C3   | 5599.9(11) | 3515(2)     | 4181.0(17) | 22.9(5)  |
| C4   | 5015.9(10) | 293(2)      | 3651.4(19) | 22.7(5)  |
| C5   | 4719.0(11) | -113(2)     | 4645.4(19) | 26.6(5)  |
| C6   | 4613.4(12) | -1599(2)    | 4634(2)    | 33.6(6)  |
| C7   | 4147.9(12) | 629(3)      | 4831(2)    | 37.5(6)  |
| C8   | 5131.5(10) | 5075(2)     | 2943.7(18) | 22.2(5)  |
| C9   | 5646.4(10) | 5488(2)     | 2269.6(19) | 23.6(5)  |
| C10  | 5666.4(13) | 4687(3)     | 1299(2)    | 37.2(7)  |
| C11  | 5591.8(13) | 6950(3)     | 2045(2)    | 38.7(7)  |
| N1   | 5185.6(8)  | 1686.4(17)  | 3678.7(14) | 19.7(4)  |
| N2   | 5220.5(8)  | 3768.5(17)  | 3385.9(13) | 18.9(4)  |
| C23  | 6021.0(9)  | -1640(2)    | 5666.1(17) | 15.3(5)  |
| C24  | 6012.5(9)  | -3166(2)    | 5617.4(16) | 15.0(4)  |
| C25  | 6233.7(9)  | 3275(2)     | 7195.0(18) | 17.7(5)  |
| C26  | 6233.8(10) | 1757(2)     | 7187.1(18) | 17.5(5)  |
| O1   | 5847.0(7)  | -1156.7(13) | 6517.9(12) | 18.6(3)  |
| O2   | 6183.4(7)  | -1016.4(14) | 4928.2(12) | 22.6(4)  |
| O3   | 6075.9(7)  | -3679.5(13) | 4774.1(11) | 20.0(3)  |
| O4   | 5947.3(6)  | -3760.2(13) | 6455.7(12) | 18.7(3)  |
| O5   | 6059.0(7)  | 3796.7(14)  | 6350.5(11) | 22.5(4)  |
| O6   | 6372.7(9)  | 3869.3(16)  | 7948.8(14) | 39.1(5)  |
| O7   | 5856.0(7)  | 1246.2(14)  | 6583.3(13) | 24.2(4)  |
| O8   | 6567.9(8)  | 1179.7(16)  | 7751.5(14) | 34.6(5)  |

**Table 3:** Anisotropic Displacement Parameters ( $\times 10^4$ ) for  $[i\text{Bu}_2\text{IM}](\text{HC}_2\text{O}_4)$ . The anisotropic displacement factor exponent takes the form:  $-2p^2[h^2a^{*2} \times U_{11} + \dots + 2hka^* \times b^* \times U_{12}]$

| Atom | $U_{11}$ | $U_{22}$ | $U_{33}$ | $U_{23}$ | $U_{13}$  | $U_{12}$ |
|------|----------|----------|----------|----------|-----------|----------|
| C12  | 19.9(11) | 18.4(12) | 18.5(11) | 2(1)     | 3.0(9)    | -0.3(9)  |
| C13  | 20.5(12) | 23.0(12) | 25.0(13) | -0.1(10) | 6.7(10)   | -2.4(9)  |
| C14  | 18.8(11) | 24.1(12) | 21.3(12) | -1.5(10) | 3.8(10)   | 1.3(9)   |
| C15  | 28.0(12) | 12.8(11) | 31.6(14) | 3.4(10)  | 9.7(10)   | 0.0(9)   |
| C16  | 25.1(12) | 20.7(12) | 39.3(15) | 7.6(12)  | 5.1(11)   | -1.6(10) |
| C17  | 46.4(17) | 33.9(15) | 45.5(18) | 14.4(14) | 12.4(14)  | 14.3(13) |
| C18  | 34.2(15) | 29.1(14) | 29.6(15) | 1.8(12)  | -2.4(11)  | 0.8(11)  |
| C19  | 25.9(12) | 14.5(11) | 24.0(13) | -0.1(9)  | 1(1)      | 0.6(9)   |
| C20  | 27.1(12) | 24.6(12) | 20.2(13) | 2.6(10)  | 2.2(10)   | 5.5(10)  |
| C21  | 63(2)    | 27.9(15) | 38.6(17) | 11.3(13) | -0.1(16)  | 8.4(14)  |
| C22  | 34.1(15) | 37.4(15) | 23.3(14) | 1.8(12)  | 0.8(11)   | 7.1(12)  |
| N3   | 21.4(9)  | 15.0(9)  | 22.7(10) | 0.8(8)   | 4.7(8)    | 0.1(8)   |
| N4   | 22.5(9)  | 13.4(9)  | 18.1(10) | 0.7(8)   | 0.6(8)    | -0.6(8)  |
| C1   | 24.0(11) | 16.0(11) | 16.3(11) | -1.7(9)  | -2.6(9)   | -1.8(9)  |
| C2   | 27.9(13) | 21.8(12) | 17.2(12) | 3.5(9)   | -5.9(10)  | -5.9(10) |
| C3   | 27.9(13) | 24.2(13) | 16.7(12) | -1(1)    | -2.3(10)  | -8(1)    |
| C4   | 33.6(13) | 11.6(11) | 22.9(12) | 1.3(10)  | -5.2(11)  | -3.8(9)  |
| C5   | 30.1(13) | 21.5(12) | 28.2(14) | 3.6(11)  | -3.8(11)  | -4.6(10) |
| C6   | 41.0(15) | 21.8(13) | 37.9(15) | 8.9(12)  | -8.0(12)  | -9.7(11) |
| C7   | 36.4(15) | 34.4(15) | 41.8(17) | 1.9(13)  | 3.0(13)   | -4.2(13) |
| C8   | 27.3(13) | 11.3(11) | 27.9(13) | 1(1)     | -0.7(11)  | 0.3(9)   |
| C9   | 24.4(12) | 19.5(12) | 27.1(13) | 4.1(10)  | -4.1(11)  | -2.4(10) |
| C10  | 43.0(16) | 35.9(15) | 32.6(15) | -0.3(12) | 8.9(13)   | -0.7(12) |
| C11  | 45.8(17) | 24.5(14) | 45.8(18) | 9.0(12)  | 3.3(14)   | -5.4(12) |
| N1   | 25.8(10) | 16.3(10) | 17.0(9)  | 2.3(8)   | -3.0(8)   | -2.3(8)  |
| N2   | 22.1(10) | 14.9(9)  | 19.9(10) | -0.8(8)  | -0.4(8)   | -2.0(8)  |
| C23  | 14.2(10) | 10.6(10) | 21.0(12) | 1.9(9)   | -1(1)     | 0.2(9)   |
| C24  | 11.6(10) | 13.8(11) | 19.7(12) | 0.7(10)  | -0.5(9)   | -0.6(8)  |
| C25  | 16.3(10) | 14.2(10) | 22.6(12) | -0.1(10) | -2.6(9)   | -1.3(9)  |
| C26  | 19.5(11) | 14.1(10) | 18.8(12) | 1(1)     | 2.4(10)   | 2.3(9)   |
| O1   | 28.8(8)  | 8.9(7)   | 18.1(8)  | -0.3(6)  | 2.1(7)    | -0.3(6)  |
| O2   | 30.0(9)  | 12.7(8)  | 25.0(9)  | 5.3(7)   | 7.2(7)    | 0.6(7)   |
| O3   | 25.3(8)  | 14.8(8)  | 19.8(9)  | -3.5(7)  | 2.2(7)    | -2.8(6)  |
| O4   | 27.2(9)  | 9.6(7)   | 19.2(8)  | 2.2(6)   | 1.2(7)    | -0.7(6)  |
| O5   | 38.3(10) | 9.2(8)   | 20.1(9)  | 1.2(7)   | -4.0(8)   | 1.5(7)   |
| O6   | 67.8(13) | 15.8(9)  | 33.8(11) | 0.0(8)   | -25.6(10) | -4.4(9)  |
| O7   | 35.7(9)  | 8.9(8)   | 28.1(9)  | 0.1(7)   | -9.9(8)   | -0.8(7)  |
| O8   | 41.8(11) | 19.1(9)  | 42.8(11) | 0.7(8)   | -20.6(9)  | 8.6(8)   |

**Table 4.** Bond lengths in Å and angles in ° for [*i*Bu<sub>2</sub>IM](HC<sub>2</sub>O<sub>4</sub>).

| Atom | Atom | Length/Å | Atom | Atom | Length/Å |
|------|------|----------|------|------|----------|
| C12  | N3   | 1.329(3) | C4   | C5   | 1.529(3) |
| C12  | N4   | 1.333(3) | C4   | N1   | 1.474(3) |
| C13  | C14  | 1.348(3) | C5   | C6   | 1.535(3) |
| C13  | N3   | 1.380(3) | C5   | C7   | 1.515(3) |
| C14  | N4   | 1.384(3) | C8   | C9   | 1.522(3) |
| C15  | C16  | 1.527(4) | C8   | N2   | 1.470(3) |
| C15  | N3   | 1.474(3) | C9   | C10  | 1.519(3) |
| C16  | C17  | 1.524(3) | C9   | C11  | 1.527(3) |
| C16  | C18  | 1.524(3) | C23  | C24  | 1.560(3) |
| C19  | C20  | 1.527(3) | C23  | O1   | 1.288(3) |
| C19  | N4   | 1.467(3) | C23  | O2   | 1.219(3) |
| C20  | C21  | 1.532(3) | C24  | O3   | 1.238(3) |
| C20  | C22  | 1.520(3) | C24  | O4   | 1.269(3) |
| C1   | N1   | 1.337(3) | C25  | C26  | 1.550(3) |
| C1   | N2   | 1.335(3) | C25  | O5   | 1.296(3) |
| C2   | C3   | 1.349(3) | C25  | O6   | 1.206(3) |
| C2   | N1   | 1.375(3) | C26  | O7   | 1.278(3) |
| C3   | N2   | 1.378(3) | C26  | O8   | 1.212(3) |

| Atom | Atom | Atom | Length/Å   | Atom | Atom | Atom | Length/Å   |
|------|------|------|------------|------|------|------|------------|
| N3   | C12  | N4   | 108.35(19) | N2   | C8   | C9   | 112.26(18) |
| C14  | C13  | N3   | 107.23(19) | C8   | C9   | C11  | 108.82(19) |
| C13  | C14  | N4   | 106.87(19) | C10  | C9   | C8   | 111.4(2)   |
| N3   | C15  | C16  | 112.45(19) | C10  | C9   | C11  | 111.4(2)   |
| C17  | C16  | C15  | 107.6(2)   | C1   | N1   | C2   | 108.91(18) |
| C18  | C16  | C15  | 112.68(19) | C1   | N1   | C4   | 126.77(19) |
| C18  | C16  | C17  | 111.0(2)   | C2   | N1   | C4   | 124.24(19) |
| N4   | C19  | C20  | 112.56(18) | C1   | N2   | C3   | 108.70(18) |
| C19  | C20  | C21  | 107.8(2)   | C1   | N2   | C8   | 127.42(19) |
| C22  | C20  | C19  | 111.93(19) | C3   | N2   | C8   | 123.86(19) |
| C22  | C20  | C21  | 111.9(2)   | O1   | C23  | C24  | 114.51(18) |
| C12  | N3   | C13  | 108.84(18) | O2   | C23  | C24  | 119.51(19) |
| C12  | N3   | C15  | 125.27(18) | O2   | C23  | O1   | 125.98(19) |
| C13  | N3   | C15  | 125.81(18) | O3   | C24  | C23  | 117.30(18) |
| C12  | N4   | C14  | 108.72(17) | O3   | C24  | O4   | 126.42(19) |
| C12  | N4   | C19  | 125.91(18) | O4   | C24  | C23  | 116.28(18) |
| C14  | N4   | C19  | 125.30(18) | O5   | C25  | C26  | 113.91(19) |
| N2   | C1   | N1   | 108.0(2)   | O6   | C25  | C26  | 120.6(2)   |
| C3   | C2   | N1   | 107.1(2)   | O6   | C25  | O5   | 125.50(19) |
| C2   | C3   | N2   | 107.3(2)   | O7   | C26  | C25  | 114.35(19) |
| N1   | C4   | C5   | 110.77(19) | O8   | C26  | C25  | 118.8(2)   |
| C4   | C5   | C6   | 109.1(2)   | O8   | C26  | O7   | 126.8(2)   |
| C7   | C5   | C4   | 112.1(2)   |      |      |      |            |
| C7   | C5   | C6   | 111.3(2)   |      |      |      |            |



**Table 5:** Torsion Angles in ° for [iBu<sub>2</sub>IM](HC<sub>2</sub>O<sub>4</sub>).

| Atom | Atom | Atom | Atom | Angle/°     |
|------|------|------|------|-------------|
| C13  | C14  | N4   | C12  | 0.0(3)      |
| C13  | C14  | N4   | C19  | -177.1(2)   |
| C14  | C13  | N3   | C12  | 0.3(3)      |
| C14  | C13  | N3   | C15  | -176.6(2)   |
| C16  | C15  | N3   | C12  | -86.9(3)    |
| C16  | C15  | N3   | C13  | 89.4(3)     |
| C20  | C19  | N4   | C12  | -108.8(2)   |
| C20  | C19  | N4   | C14  | 67.8(3)     |
| N3   | C12  | N4   | C14  | 0.2(3)      |
| N3   | C12  | N4   | C19  | 177.23(19)  |
| N3   | C13  | C14  | N4   | -0.2(3)     |
| N3   | C15  | C16  | C17  | -178.78(19) |
| N3   | C15  | C16  | C18  | -56.1(3)    |
| N4   | C12  | N3   | C13  | -0.3(3)     |
| N4   | C12  | N3   | C15  | 176.60(19)  |
| N4   | C19  | C20  | C21  | -173.8(2)   |
| N4   | C19  | C20  | C22  | 62.7(3)     |
| C2   | C3   | N2   | C1   | -0.3(3)     |
| C2   | C3   | N2   | C8   | -178.8(2)   |
| C3   | C2   | N1   | C1   | -0.6(3)     |
| C3   | C2   | N1   | C4   | -177.6(2)   |
| C5   | C4   | N1   | C1   | -115.7(3)   |
| C5   | C4   | N1   | C2   | 60.7(3)     |
| C9   | C8   | N2   | C1   | -102.4(2)   |
| C9   | C8   | N2   | C3   | 75.8(3)     |
| N1   | C1   | N2   | C3   | -0.1(3)     |
| N1   | C1   | N2   | C8   | 178.35(19)  |
| N1   | C2   | C3   | N2   | 0.6(3)      |
| N1   | C4   | C5   | C6   | -173.66(19) |
| N1   | C4   | C5   | C7   | 62.6(3)     |
| N2   | C1   | N1   | C2   | 0.4(3)      |
| N2   | C1   | N1   | C4   | 177.3(2)    |
| N2   | C8   | C9   | C10  | 69.9(3)     |
| N2   | C8   | C9   | C11  | -166.9(2)   |
| O1   | C23  | C24  | O3   | 167.92(19)  |
| O1   | C23  | C24  | O4   | -12.8(3)    |
| O2   | C23  | C24  | O3   | -11.9(3)    |
| O2   | C23  | C24  | O4   | 167.30(19)  |
| O5   | C25  | C26  | O7   | -27.7(3)    |
| O5   | C25  | C26  | O8   | 154.2(2)    |
| O6   | C25  | C26  | O7   | 150.5(2)    |
| O6   | C25  | C26  | O8   | -27.6(3)    |

**Table 6.** Hydrogen Atom Coordinates ( $\text{\AA} \times 10^4$ ) and Isotropic Displacement Parameters ( $\text{\AA}^2 \times 10^3$ ) for  $[\text{iBu}_2\text{IM}](\text{HC}_2\text{O}_4)$ .  $U_{eq}$  is defined as 1/3 of the trace of the orthogonalised  $U_{ij}$ .

| Atom | x        | y        | z        | $U_{eq}$ |
|------|----------|----------|----------|----------|
| H12  | 6760     | 7401     | 3922     | 23       |
| H13  | 8303     | 8598     | 2736     | 27       |
| H14  | 8361     | 6196     | 2978     | 26       |
| H15A | 7538     | 10417    | 3345     | 29       |
| H15B | 6930     | 9924     | 3843     | 29       |
| H16  | 6531     | 9459     | 2239     | 34       |
| H17A | 7014     | 12052    | 2314     | 63       |
| H17B | 6426     | 11605    | 2899     | 63       |
| H17C | 6436     | 11642    | 1686     | 63       |
| H18A | 7638     | 10303    | 1404     | 46       |
| H18B | 7058     | 10049    | 735      | 46       |
| H18C | 7370     | 8857     | 1314     | 46       |
| H19A | 7425     | 4407     | 3280     | 26       |
| H19B | 6921     | 4962     | 4017     | 26       |
| H20  | 8136     | 4636     | 4608     | 29       |
| H21A | 7783     | 2792     | 5545     | 65       |
| H21B | 7682     | 2596     | 4354     | 65       |
| H21C | 7138     | 3000     | 5066     | 65       |
| H22A | 7674     | 6299     | 5563     | 47       |
| H22B | 7818     | 5070     | 6275     | 47       |
| H22C | 7156     | 5309     | 5881     | 47       |
| H1   | 4693     | 2543     | 2558     | 22       |
| H2   | 5787     | 1756     | 4878     | 27       |
| H3   | 5835     | 4139     | 4533     | 28       |
| H4A  | 5373     | -251     | 3538     | 27       |
| H4B  | 4740     | 141      | 3080     | 27       |
| H5   | 4998     | 90       | 5213     | 32       |
| H6A  | 4468     | -1880    | 5300     | 50       |
| H6B  | 4986     | -2050    | 4481     | 50       |
| H6C  | 4318     | -1813    | 4115     | 50       |
| H7A  | 4223     | 1572     | 4783     | 56       |
| H7B  | 3998     | 420      | 5510     | 56       |
| H7C  | 3853     | 374      | 4322     | 56       |
| H8A  | 5084     | 5722     | 3497     | 27       |
| H8B  | 4762     | 5074     | 2539     | 27       |
| H9   | 6024     | 5339     | 2650     | 28       |
| H10A | 5704     | 3756     | 1468     | 56       |
| H10B | 6007     | 4961     | 890      | 56       |
| H10C | 5301     | 4828     | 913      | 56       |
| H11A | 5931     | 7234     | 1637     | 58       |
| H11B | 5585     | 7439     | 2684     | 58       |
| H11C | 5224     | 7113     | 1670     | 58       |
| H5A  | 6009(11) | 4810(30) | 6410(20) | 34       |
| H1A  | 5855(15) | 90(40)   | 6580(30) | 85(11)   |

**Table 7:** Hydrogen Bond information for [*i*Bu<sub>2</sub>IM](HC<sub>2</sub>O<sub>4</sub>).

| <b>D</b> | <b>H</b> | <b>A</b>        | <b>d(D-H)/Å</b> | <b>d(H-A)/Å</b> | <b>d(D-A)/Å</b> | <b>D-H-A/deg</b> |
|----------|----------|-----------------|-----------------|-----------------|-----------------|------------------|
| O5       | H5A      | O4 <sup>1</sup> | 1.04(3)         | 1.47(3)         | 2.5112(19)      | 178(3)           |
| O7       | H1A      | O1              | 1.18(4)         | 1.28(4)         | 2.4552(19)      | 177(4)           |
| C1       | H1       | O1 <sup>2</sup> | 0.95            | 2.32            | 3.167(3)        | 148.6            |
| C1       | H1       | O4 <sup>2</sup> | 0.95            | 2.40            | 3.202(3)        | 142.4            |

<sup>1</sup><sub>1+x,1+y,+z</sub>, <sup>2</sup><sub>1-x,-y,-1/2+z</sub>

Crystal structure of  $[i\text{Bu}_2\text{IM}](\text{HCO}_3)$  - view 1 with labelled atoms

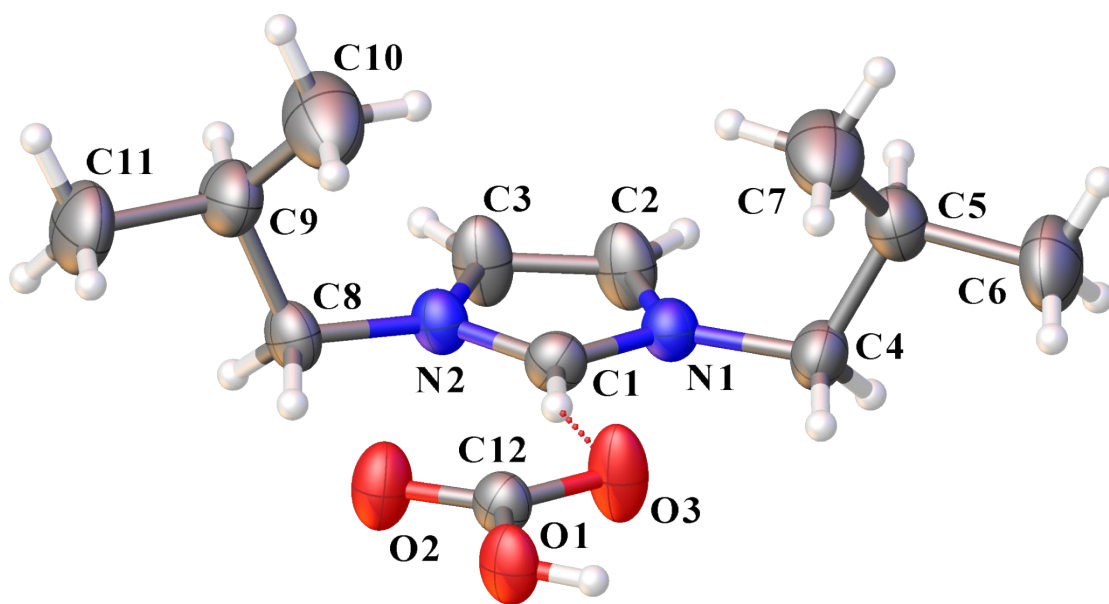

Crystal structure of  $[i\text{Bu}_2\text{IM}](\text{HCO}_3)$  - view 2

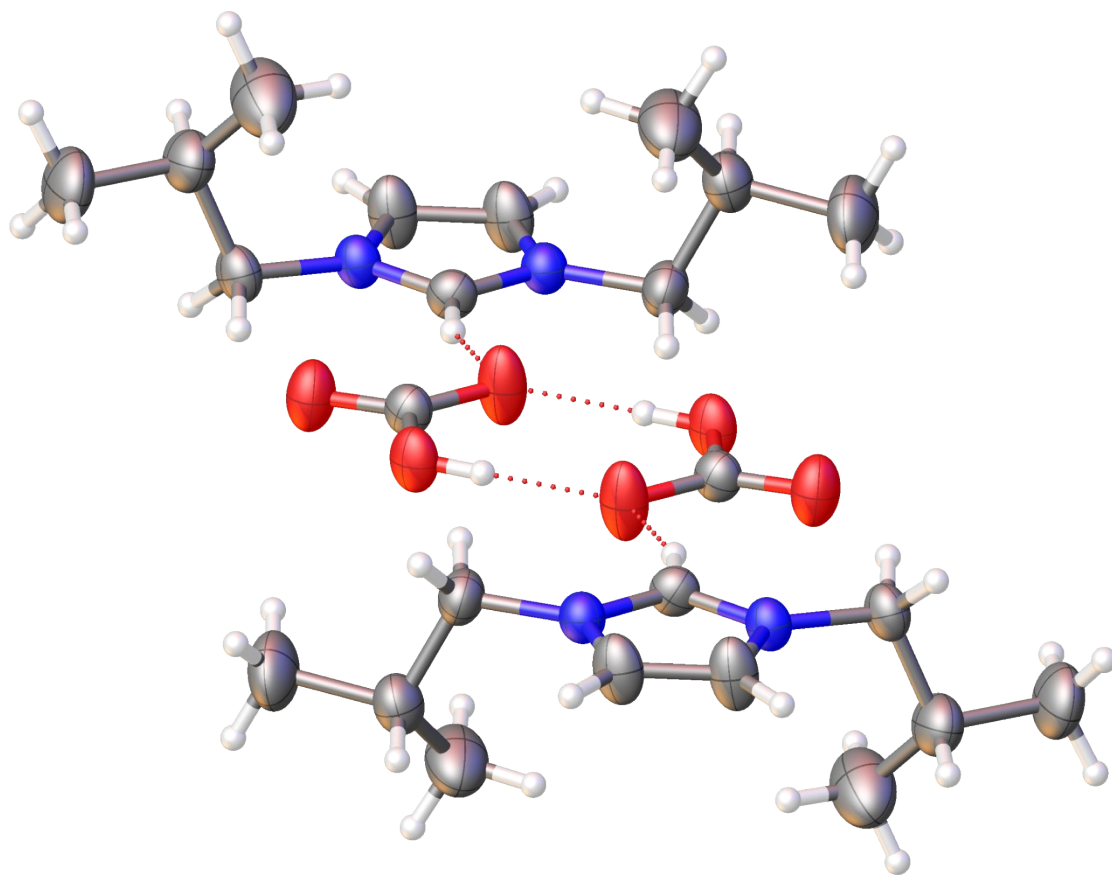

**Table 8.** Crystal data and structure refinement for [iBu<sub>2</sub>IM](HCO<sub>3</sub>)

|                                         |                                                               |
|-----------------------------------------|---------------------------------------------------------------|
| CCDC                                    | 1560698                                                       |
| Formula                                 | C <sub>12</sub> H <sub>22</sub> N <sub>2</sub> O <sub>3</sub> |
| D <sub>calc.</sub> / g cm <sup>-3</sup> | 1.106                                                         |
| μ / mm <sup>-1</sup>                    | 0.079                                                         |
| Formula Weight                          | 242.31                                                        |
| Colour                                  | colourless                                                    |
| Shape                                   | prism                                                         |
| Size / mm <sup>3</sup>                  | 0.55 × 0.50 × 0.50                                            |
| T / K                                   | 298                                                           |
| Crystal System                          | monoclinic                                                    |
| Space Group                             | <i>P</i> 2 <sub>1</sub> / <i>n</i>                            |
| a / Å                                   | 10.1801(12)                                                   |
| b / Å                                   | 12.3007(15)                                                   |
| c / Å                                   | 11.6842(15)                                                   |
| α / °                                   | 90                                                            |
| β / °                                   | 96.132(4)                                                     |
| γ / °                                   | 90                                                            |
| V = Å <sup>3</sup>                      | 1454.8(3)                                                     |
| Z                                       | 4                                                             |
| Θ <sub>min</sub> / °                    | 2.411                                                         |
| Θ <sub>max</sub> / °                    | 27.665                                                        |
| Measured Refl.                          | 31087                                                         |
| Independent Refl.                       | 3369                                                          |
| Reflections Used                        | 1961                                                          |
| R <sub>int</sub>                        | 0.0348                                                        |
| Parameters                              | 159                                                           |
| Restraints                              | 0                                                             |
| Largest Peak Largest Peak               | 0.527                                                         |
| Deepest Hole                            | -0.222                                                        |
| Goof                                    | 1.017                                                         |
| ωR <sub>2</sub> (all data)              | 0.2294                                                        |
| ωR <sub>2</sub>                         | 0.1815                                                        |
| R <sub>1</sub> (all data)               | 0.1170                                                        |
| R <sub>1</sub>                          | 0.0679                                                        |

**Table 9.** Fractional atomic coordinates ( $\times 10^4$ ) and equivalent isotropic displacement parameters ( $\text{\AA}^2 \times 10^3$ ) for  $[i\text{Bu}_2\text{IM}](\text{HCO}_3)$ .  $U(eq)$  is defined as one third of the trace of the orthogonalized  $U_{ij}$  tensor.

| Atom | x          | y          | z          | U(eq)     |
|------|------------|------------|------------|-----------|
| O1   | 3398.0(17) | 282.3(16)  | 5437.1(17) | 71.9(6)   |
| N2   | 3601.9(19) | 3459.7(17) | 1947.5(17) | 55.9(5)   |
| N1   | 5490.8(19) | 2743.3(17) | 1749.3(17) | 56.4(5)   |
| O2   | 2587(2)    | 1622.3(18) | 4359.3(18) | 84.2(7)   |
| O3   | 4608(2)    | 1029.1(19) | 4197(2)    | 92.9(8)   |
| C1   | 4434(2)    | 2679(2)    | 2298(2)    | 57.1(6)   |
| C12  | 3540(2)    | 1025(2)    | 4633(2)    | 56.9(6)   |
| C8   | 2335(2)    | 3662(2)    | 2397(2)    | 63.6(7)   |
| C4   | 6651(3)    | 2032(2)    | 1916(3)    | 70.0(7)   |
| C2   | 5329(3)    | 3599(3)    | 1005(3)    | 78.6(9)   |
| C5   | 7826(3)    | 2536(3)    | 2605(3)    | 78.2(8)   |
| C3   | 4160(3)    | 4048(3)    | 1130(3)    | 80.4(9)   |
| C9   | 2371(3)    | 4622(3)    | 3184(3)    | 88(1)     |
| C11  | 1030(4)    | 4714(4)    | 3655(4)    | 112.9(14) |
| C6   | 8967(3)    | 1727(4)    | 2671(4)    | 117.3(14) |
| C7   | 7535(4)    | 2892(4)    | 3764(4)    | 123.7(16) |
| C10  | 3474(4)    | 4603(5)    | 4102(4)    | 138.8(19) |

**Table 10:** Anisotropic Displacement Parameters ( $\times 10^4$ ) for  $[i\text{Bu}_2\text{IM}](\text{HCO}_3)$ . The anisotropic displacement factor exponent takes the form:  $-2p^2[h^2a^{*2} \times U_{11} + \dots + 2hka^* \times b^* \times U_{12}]$

| Atom | $U_{11}$ | $U_{22}$  | $U_{33}$  | $U_{23}$  | $U_{13}$ | $U_{12}$ |
|------|----------|-----------|-----------|-----------|----------|----------|
| O1   | 61.3(11) | 83.3(13)  | 76.5(12)  | 25.6(10)  | 32.1(9)  | 6.3(9)   |
| N2   | 50.8(10) | 64.2(12)  | 54.3(11)  | 10.4(9)   | 13.4(8)  | 0.7(9)   |
| N1   | 53.0(11) | 61.5(12)  | 55.8(12)  | 4.1(10)   | 10.8(9)  | 2.0(9)   |
| O2   | 75.6(13) | 91.7(15)  | 89.7(15)  | 26.9(12)  | 28.7(11) | 24.5(11) |
| O3   | 71.0(12) | 101.5(16) | 114.2(17) | 60.7(13)  | 46.8(12) | 21.8(11) |
| C1   | 62.2(14) | 54.7(13)  | 56.5(14)  | 8.4(11)   | 15.6(11) | -2.9(11) |
| C12  | 56.4(14) | 59.9(14)  | 56.9(14)  | 6.4(12)   | 18.2(11) | -1.5(11) |
| C8   | 49.2(13) | 79.2(17)  | 65.1(15)  | 8.8(13)   | 18.2(11) | -0.2(12) |
| C4   | 62.9(16) | 71.0(17)  | 77.1(18)  | -5.6(14)  | 11.3(13) | 14.2(13) |
| C2   | 63.6(16) | 104(2)    | 72.5(18)  | 32.7(17)  | 27.2(13) | 7.7(15)  |
| C5   | 62.0(16) | 87(2)     | 86(2)     | 6.2(16)   | 7.8(14)  | 5.5(14)  |
| C3   | 64.5(16) | 101(2)    | 79.6(19)  | 45.6(17)  | 25.1(14) | 16.1(15) |
| C9   | 73.4(19) | 99(2)     | 95(2)     | -14.3(19) | 28.4(17) | 4.9(17)  |
| C11  | 89(2)    | 134(3)    | 123(3)    | -15(3)    | 47(2)    | 22(2)    |
| C6   | 78(2)    | 149(4)    | 122(3)    | -9(3)     | -4(2)    | 40(2)    |
| C7   | 94(3)    | 163(4)    | 110(3)    | -47(3)    | -9(2)    | 12(3)    |
| C10  | 105(3)   | 201(5)    | 111(3)    | -56(3)    | 16(3)    | 7(3)     |

**Table 11.** Bond lengths in Å and angles in ° for [*i*Bu<sub>2</sub>IM](HCO<sub>3</sub>).

| Atom | Atom | Length/ Å | Atom | Atom | Length/ Å |
|------|------|-----------|------|------|-----------|
| O1   | C12  | 1.330(3)  | O3   | C12  | 1.248(3)  |
| N2   | C1   | 1.317(3)  | C8   | C9   | 1.495(4)  |
| N2   | C8   | 1.465(3)  | C4   | C5   | 1.502(4)  |
| N2   | C3   | 1.369(3)  | C2   | C3   | 1.334(4)  |
| N1   | C1   | 1.312(3)  | C5   | C6   | 1.524(5)  |
| N1   | C4   | 1.466(3)  | C5   | C7   | 1.482(5)  |
| N1   | C2   | 1.364(3)  | C9   | C11  | 1.531(4)  |
| O2   | C12  | 1.232(3)  | C9   | C10  | 1.467(6)  |

| Atom | Atom | Atom | Angle/ ° | Atom | Atom | Atom | Angle/ ° |
|------|------|------|----------|------|------|------|----------|
| C1   | N2   | C8   | 125.0(2) | N2   | C8   | C9   | 112.9(2) |
| C    | N2   | C3   | 107.5(2) | N1   | C4   | C5   | 114.1(2) |
| C3   | N2   | C8   | 127.4(2) | C3   | C2   | N1   | 107.4(2) |
| C1   | N1   | C4   | 126.1(2) | C4   | C5   | C6   | 108.5(3) |
| C1   | N1   | C2   | 108.0(2) | C7   | C5   | C4   | 112.7(3) |
| C2   | N1   | C4   | 125.9(2) | C7   | C5   | C6   | 111.9(3) |
| N1   | C1   | N2   | 109.7(2) | C2   | C3   | N2   | 107.4(2) |
| O2   | C12  | O1   | 116.8(2) | C8   | C9   | C11  | 108.4(3) |
| O2   | C12  | O3   | 126.0(2) | C10  | C9   | C8   | 113.9(3) |
| O3   | C12  | O1   | 117.1(2) | C10  | C9   | C11  | 112.4(3) |

**Table 12:** Torsion Angles in ° for for [*i*Bu<sub>2</sub>IM](HCO<sub>3</sub>).

| Atom | Atom | Atom | Atom | Angle/°   |
|------|------|------|------|-----------|
| N2   | C8   | C9   | C11  | -176.7(3) |
| N2   | C8   | C9   | C10  | -50.8(4)  |
| N1   | C4   | C5   | C6   | -177.9(3) |
| N1   | C4   | C5   | C7   | 57.7(4)   |
| N1   | C2   | C3   | N2   | -0.4(4)   |
| C1   | N2   | C8   | C9   | 104.5(3)  |
| C1   | N2   | C3   | C2   | 0.1(4)    |
| C1   | N1   | C4   | C5   | -103.2(3) |
| C1   | N1   | C2   | C3   | 0.5(4)    |
| C8   | N2   | C1   | N1   | -178.0(2) |
| C8   | N2   | C3   | C2   | 178.2(3)  |
| C4   | N1   | C1   | N2   | 178.7(2)  |
| C4   | N1   | C2   | C3   | -178.7(3) |
| C2   | N1   | C1   | N2   | -0.4(3)   |
| C2   | N1   | C4   | C5   | 75.8(4)   |
| C3   | N2   | C1   | N1   | 0.2(3)    |
| C3   | N2   | C8   | C9   | -73.3(4)  |

**Table 13.** Hydrogen Atom Coordinates ( $\text{\AA} \times 10^4$ ) and Isotropic Displacement Parameters ( $\text{\AA}^2 \times 10^3$ ) for  $[\textit{i}\text{Bu}_2\text{IM}](\text{HCO}_3)$ .

| Atom | x    | y    | z    | U(eq) |
|------|------|------|------|-------|
| H1A  | 4041 | -123 | 5498 | 108   |
| H1   | 4294 | 2160 | 2852 | 69    |
| H8A  | 2088 | 3022 | 2810 | 76    |
| H8B  | 1661 | 3779 | 1757 | 76    |
| H4A  | 6901 | 1826 | 1168 | 84    |
| H4B  | 6412 | 1374 | 2301 | 84    |
| H2   | 5924 | 3827 | 504  | 94    |
| H5   | 8085 | 3178 | 2187 | 94    |
| H3   | 3792 | 4649 | 734  | 96    |
| H9   | 2479 | 5270 | 2716 | 106   |
| H11A | 340  | 4727 | 3027 | 169   |
| H11B | 1001 | 5373 | 4093 | 169   |
| H11C | 905  | 4102 | 4141 | 169   |
| H6A  | 8703 | 1060 | 3006 | 176   |
| H6B  | 9714 | 2025 | 3137 | 176   |
| H6C  | 9202 | 1588 | 1910 | 176   |
| H7A  | 6852 | 3434 | 3687 | 186   |
| H7B  | 8318 | 3193 | 4174 | 186   |
| H7C  | 7245 | 2280 | 4180 | 186   |
| H10A | 3372 | 3998 | 4603 | 208   |
| H10B | 3479 | 5267 | 4535 | 208   |
| H10C | 4291 | 4534 | 3768 | 208   |

**Table 14:** Hydrogen Bond information for  $[\textit{i}\text{Bu}_2\text{IM}](\text{HCO}_3)$ .

| D  | H   | A               | d(D-H)/ $\text{\AA}$ | d(H-A)/ $\text{\AA}$ | d(D-A)/ $\text{\AA}$ | D-H-A/deg |
|----|-----|-----------------|----------------------|----------------------|----------------------|-----------|
| O1 | H1A | O3 <sup>1</sup> | 0.82                 | 1.78                 | 2.593(3)             | 173.1     |
| C1 | H1  | O3              | 0.93                 | 2.10                 | 2.997(3)             | 162.5     |

<sup>1</sup>1-x,-y,1-z



## References

- [1] APEX2 suite for crystallographic software: Bruker V8.34A: SADABS, SAINT, APEX2. Bruker AXS Inc  
Bruker axs, Madison, WI (2014).
- [2] Sheldrick, G. M. *Acta Cryst.* (2008) **A64**, 112-12.
- [3] O.V. Dolomanov and L.J. Bourhis and R.J. Gildea and J.A.K. Howard and H. Puschmann, Olex2: A  
complete structure solution, refinement and analysis program, *J. Appl. Cryst.*, (2009), **42**, 339-  
341.

## **$^1\text{H}$ and $^{13}\text{C}$ NMR spectra for imidazolium salts**

|                                                            |         |
|------------------------------------------------------------|---------|
| $[\textit{i}\text{Bu}_2\text{IM}](\text{HC}_2\text{O}_4)$  | page 19 |
| $[\textit{i}\text{Bu}_2\text{IM}](\text{HCO}_3)$           | page 21 |
| $[\textit{i}\text{Bu}_2\text{IM}]_2(\text{C}_2\text{O}_4)$ | page 23 |
| $[\textit{i}\text{Bu}_2\text{IM}](\text{CO}_2)$            | page 25 |
| $[\textit{i}\text{Bu}_2\text{IM}](\text{OAc})$             | page 27 |

### **Experiments of $\text{CO}_2$ chemisorption:**

|                                                       |                                        |         |
|-------------------------------------------------------|----------------------------------------|---------|
| With $[\textit{i}\text{Bu}_2\text{IM}](\text{OAc})$ : | Before $\text{CO}_2$ bubbling          | page 29 |
|                                                       | After $\text{CO}_2$ bubbling           | page 31 |
|                                                       | NMR sample open air                    | page 33 |
|                                                       | After addition of $\text{D}_2\text{O}$ | page 35 |
|                                                       | Before $\text{CO}_2$ bubbling          | page 37 |
|                                                       | After $\text{CO}_2$ bubbling           | page 38 |

[iBu<sub>2</sub>IM](HC<sub>2</sub>O<sub>4</sub>)

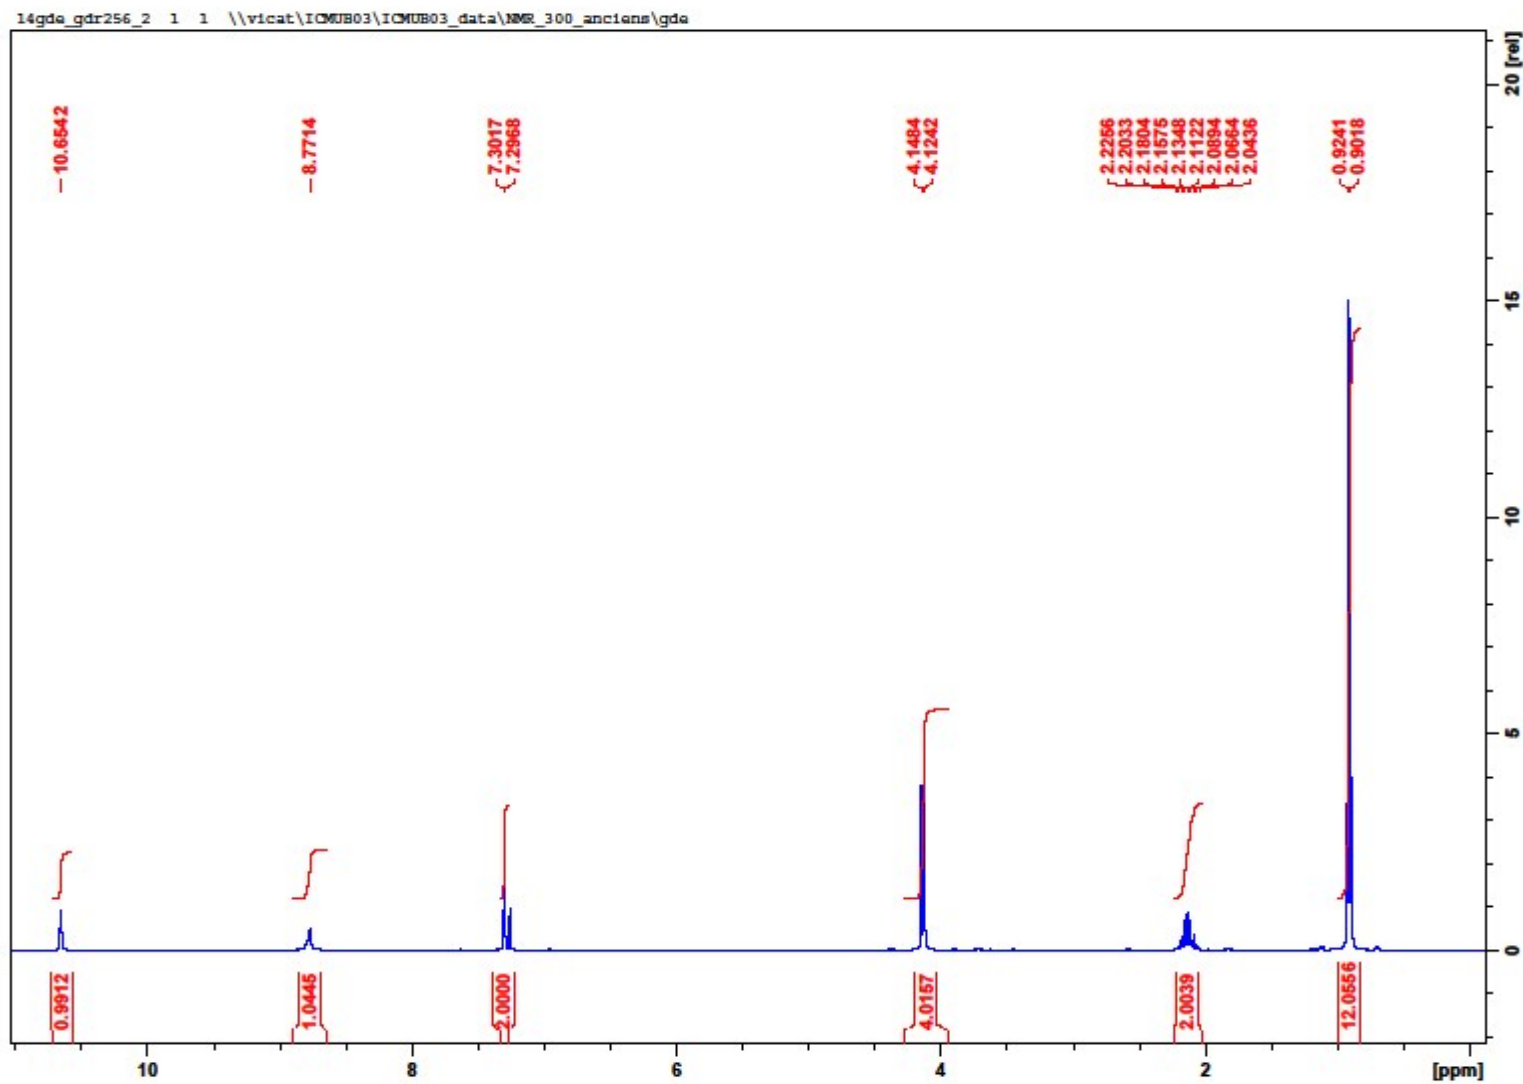

14gde\_gdr256\_2 4 1 \\vicat\ICMUB03\ICMUB03\_data\NMR\_300\_anciens\gde

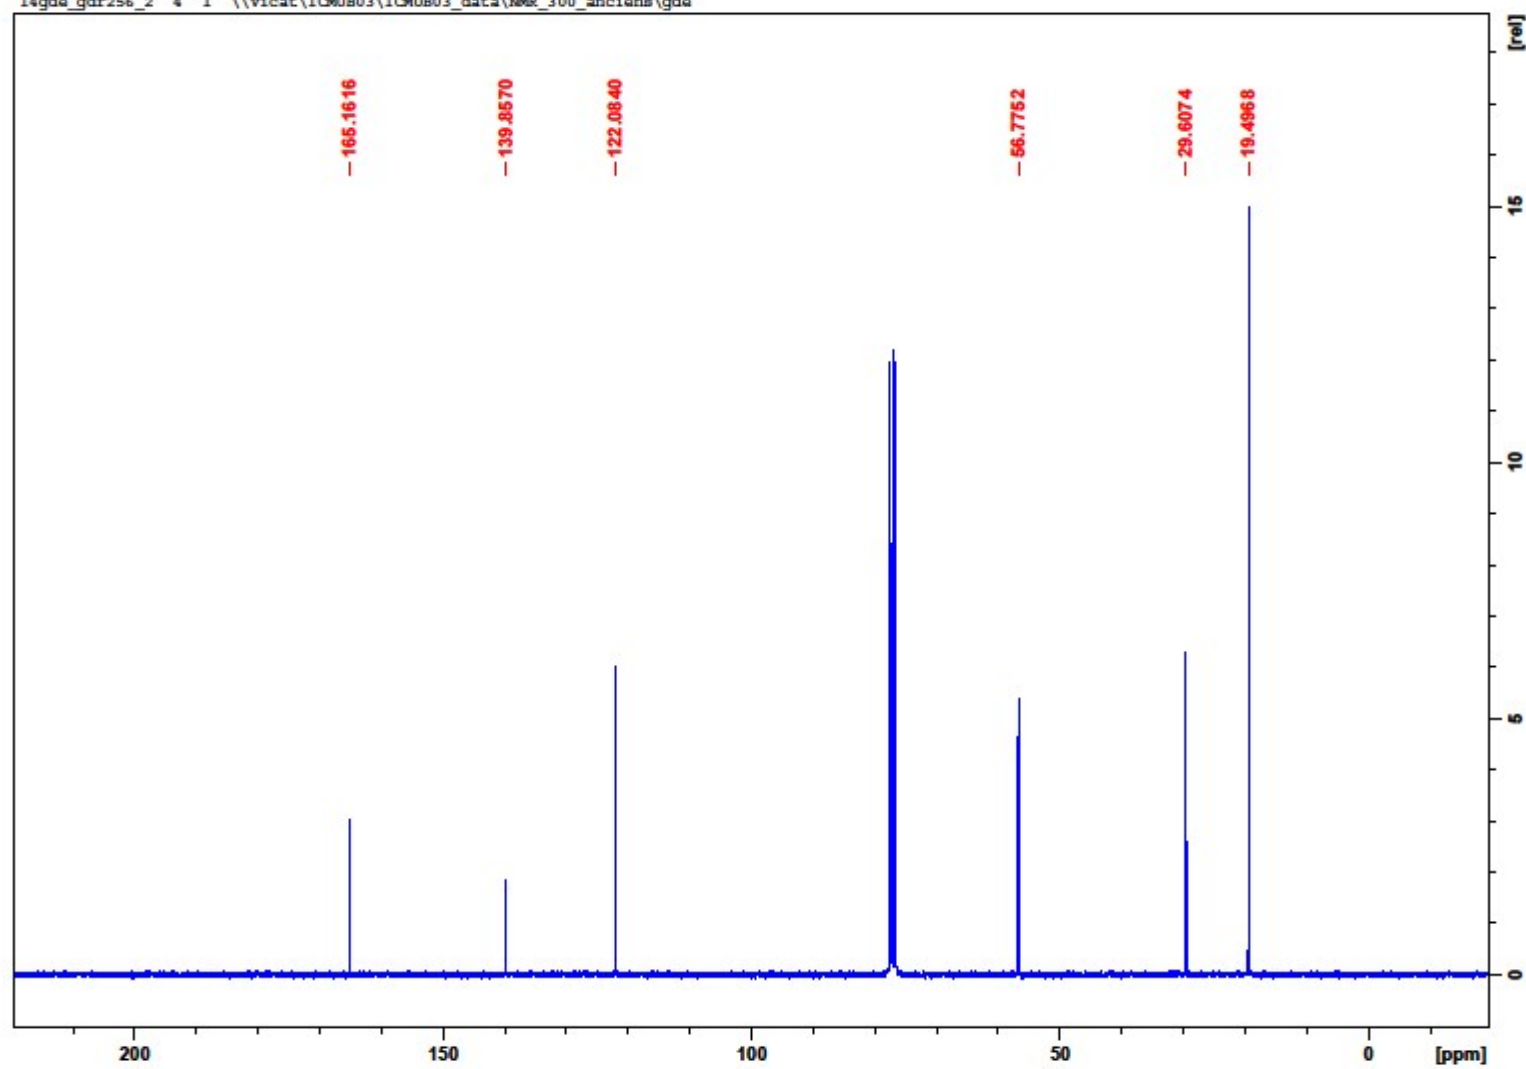

[iBu<sub>2</sub>IM](HCO<sub>3</sub>)

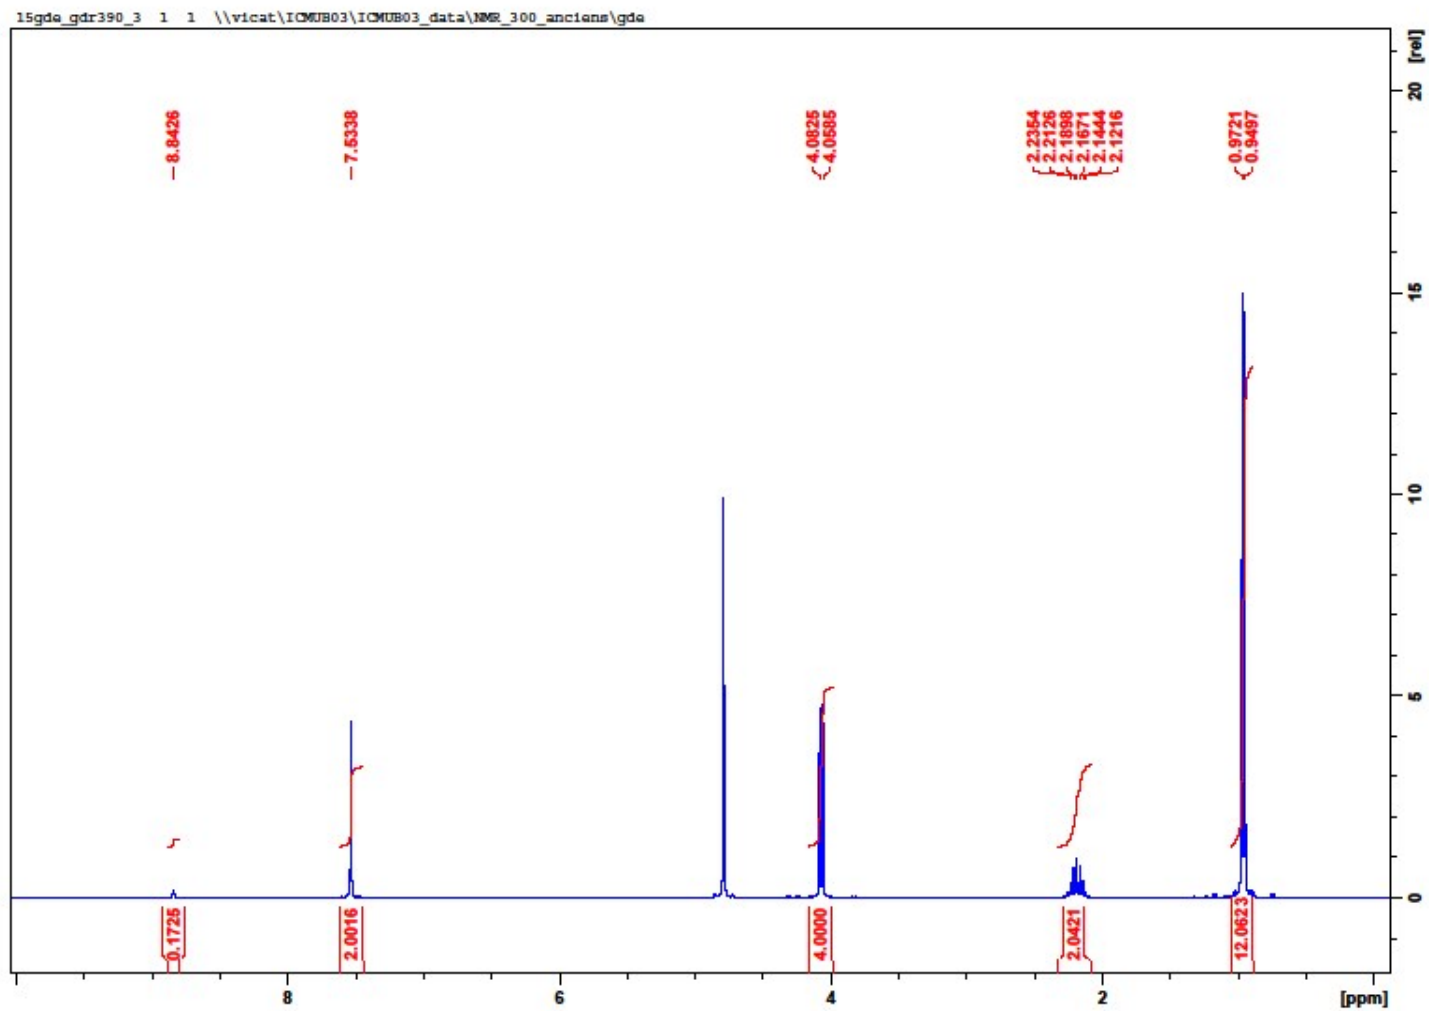

"17afo\_AF283 IM HCO3" 1 1 "C:\Users\afournier\Documents\Documents\ANALYSES\RMN\AF283 ibu2im2 oxalate"

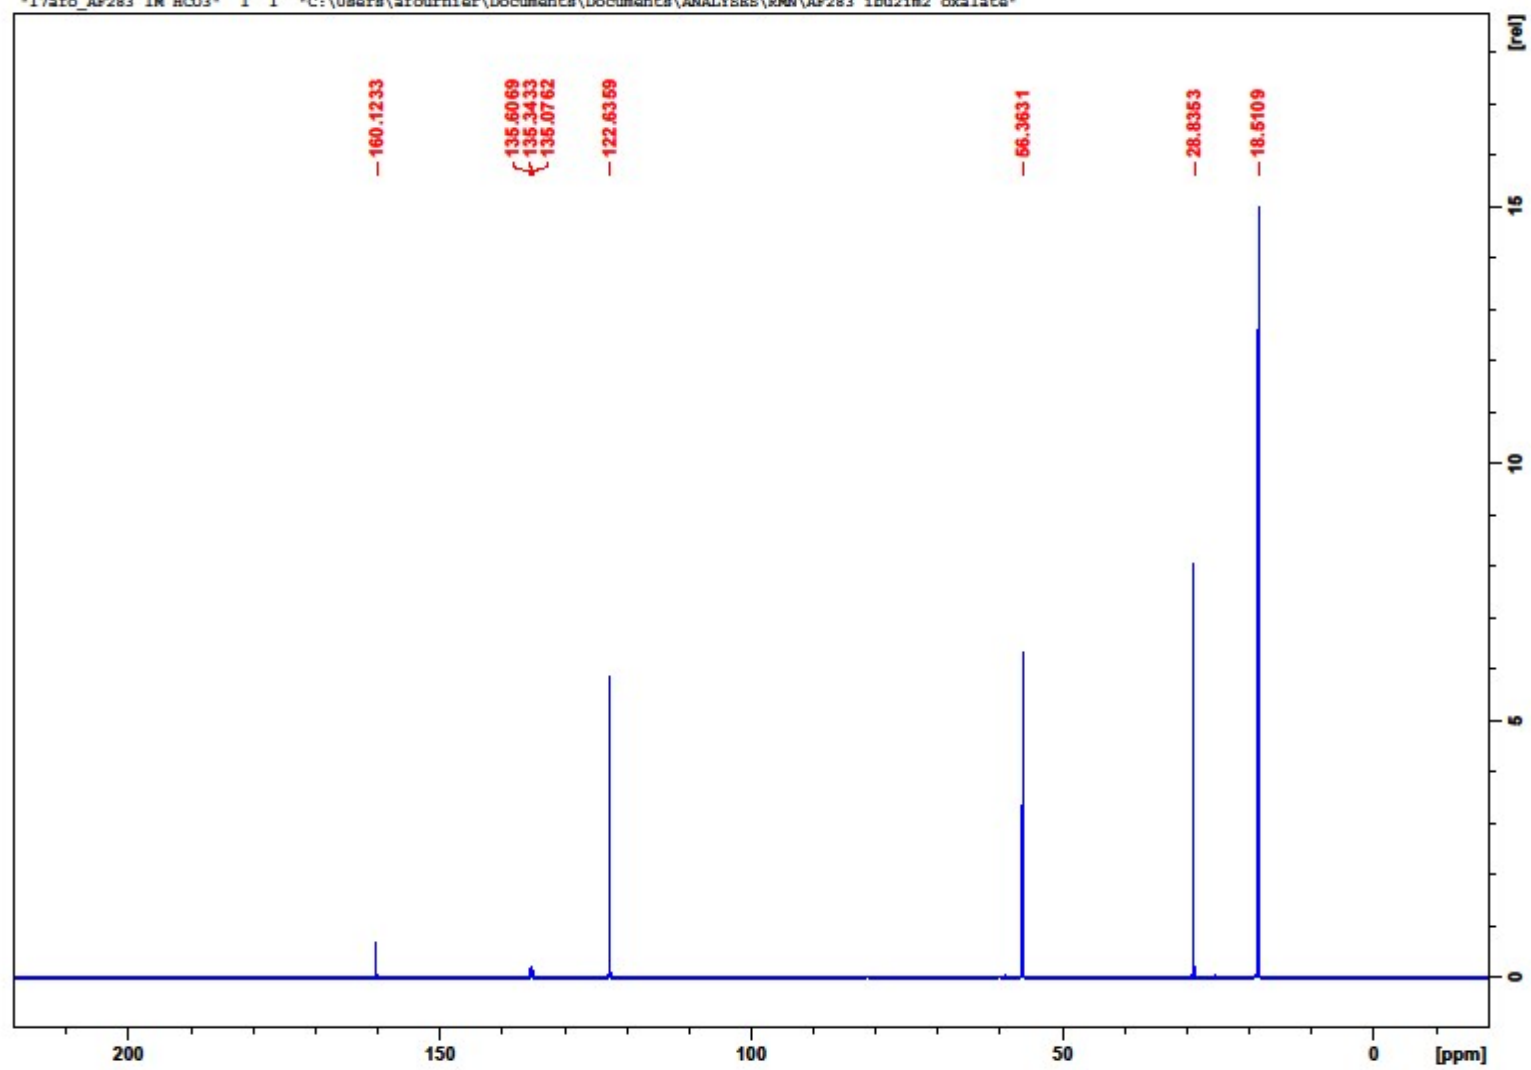

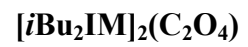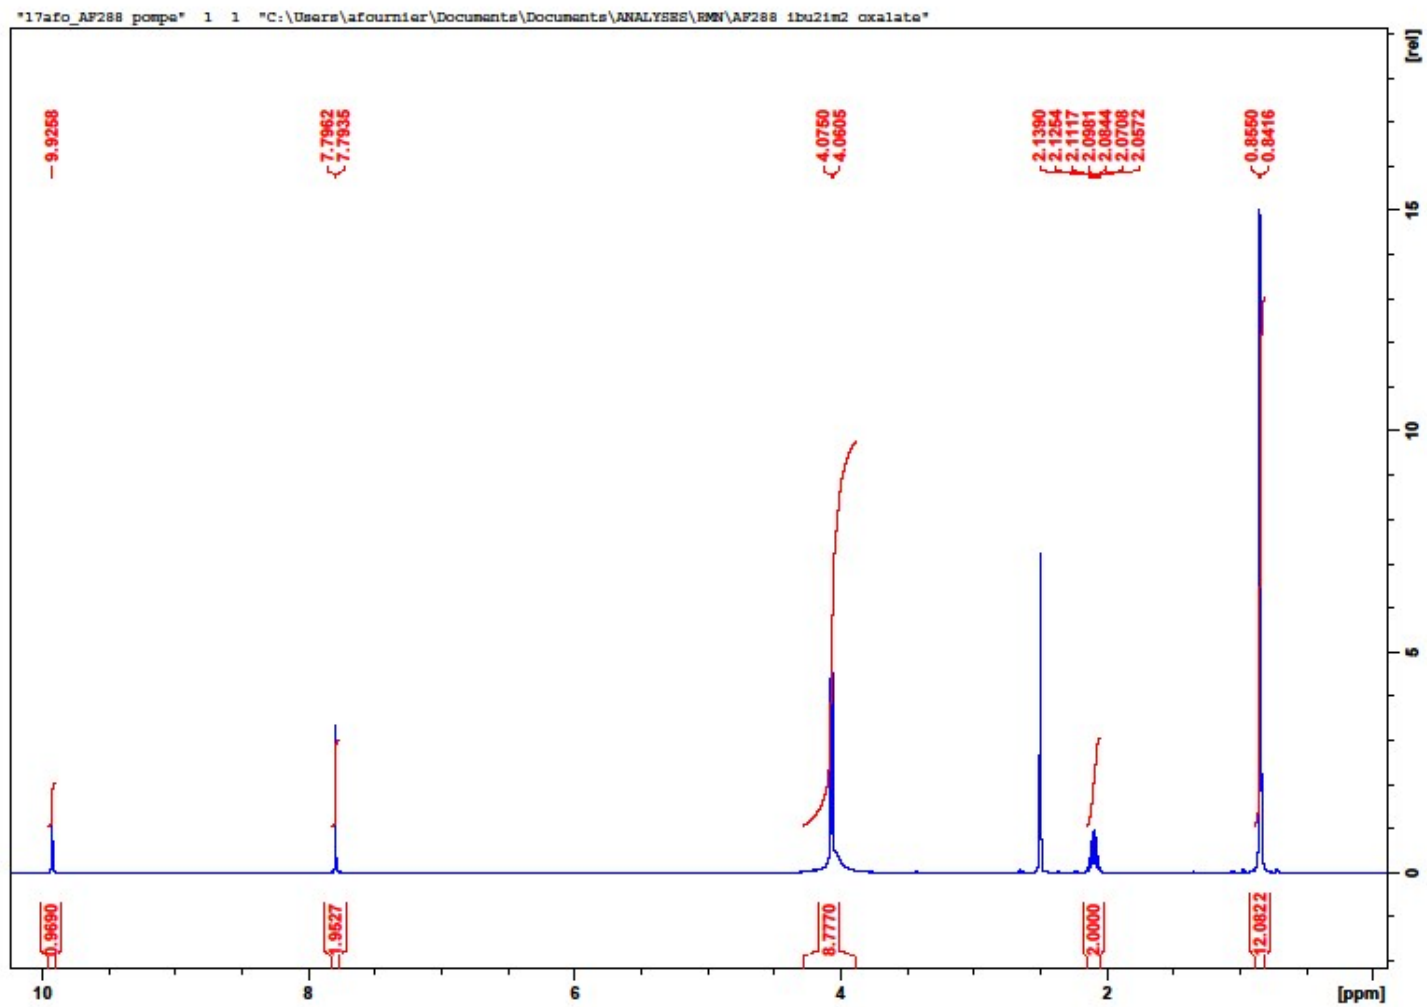

"17afo\_AF283 brut" 1 1 "C:\Users\afournier\Documents\Documents\ANALYSES\RMV\AF283 1bu2in2 oxalate"

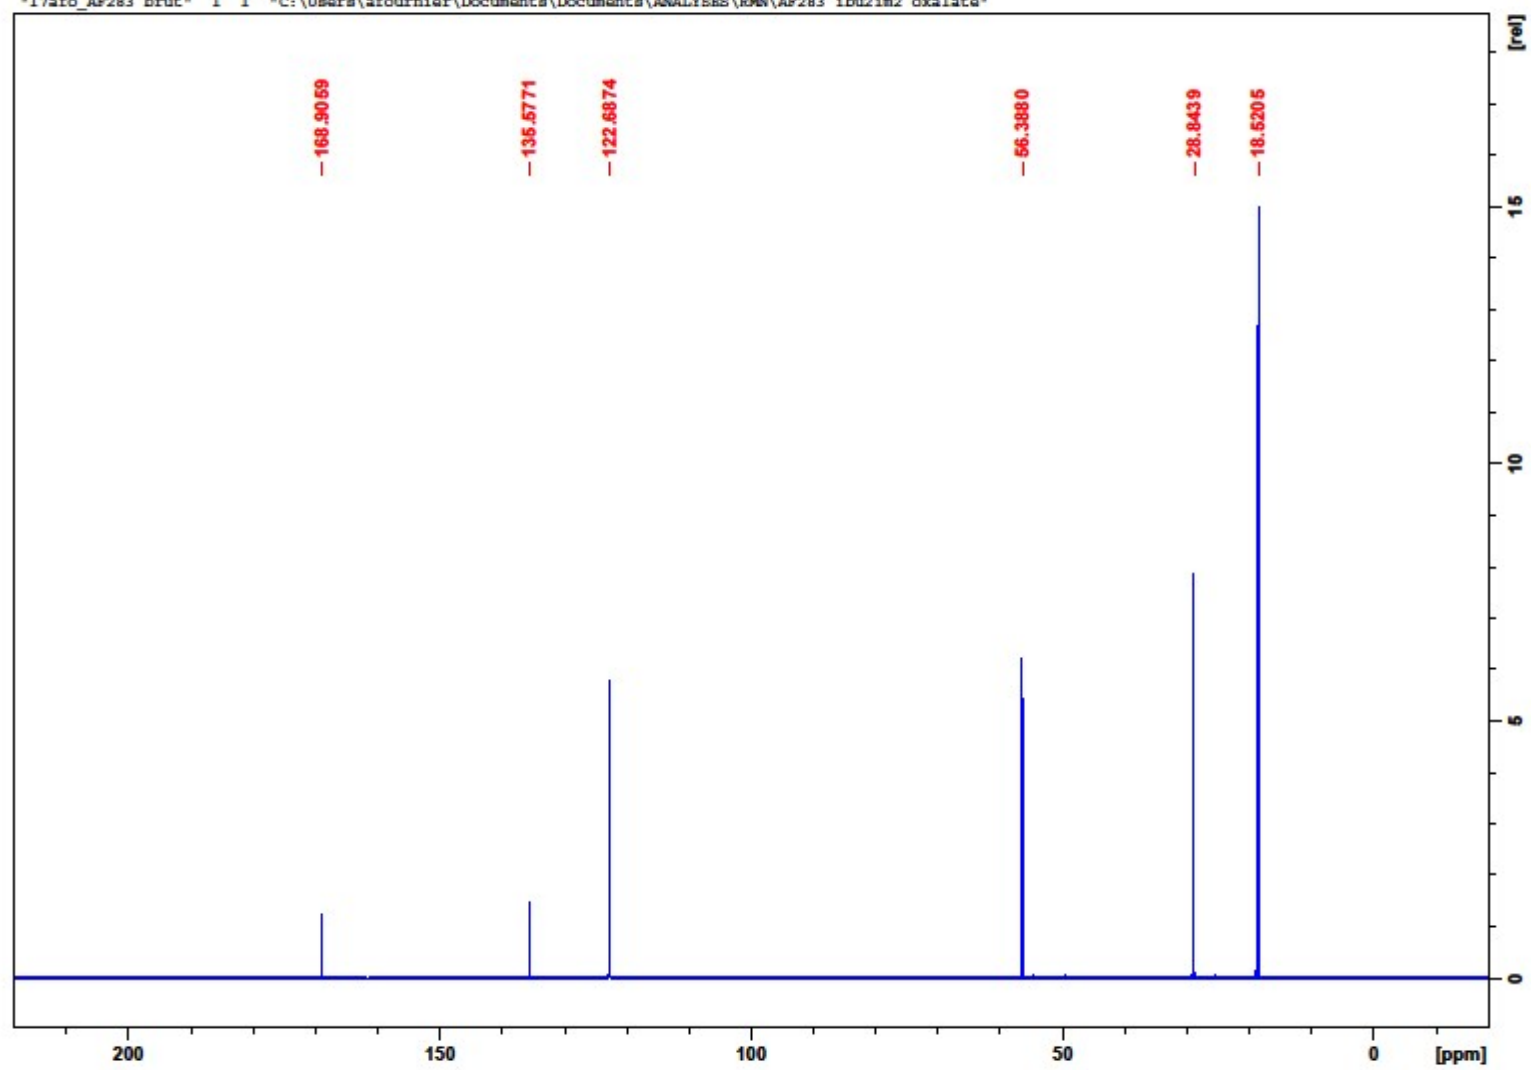



**[iBu<sub>2</sub>IM](CO<sub>2</sub>)**

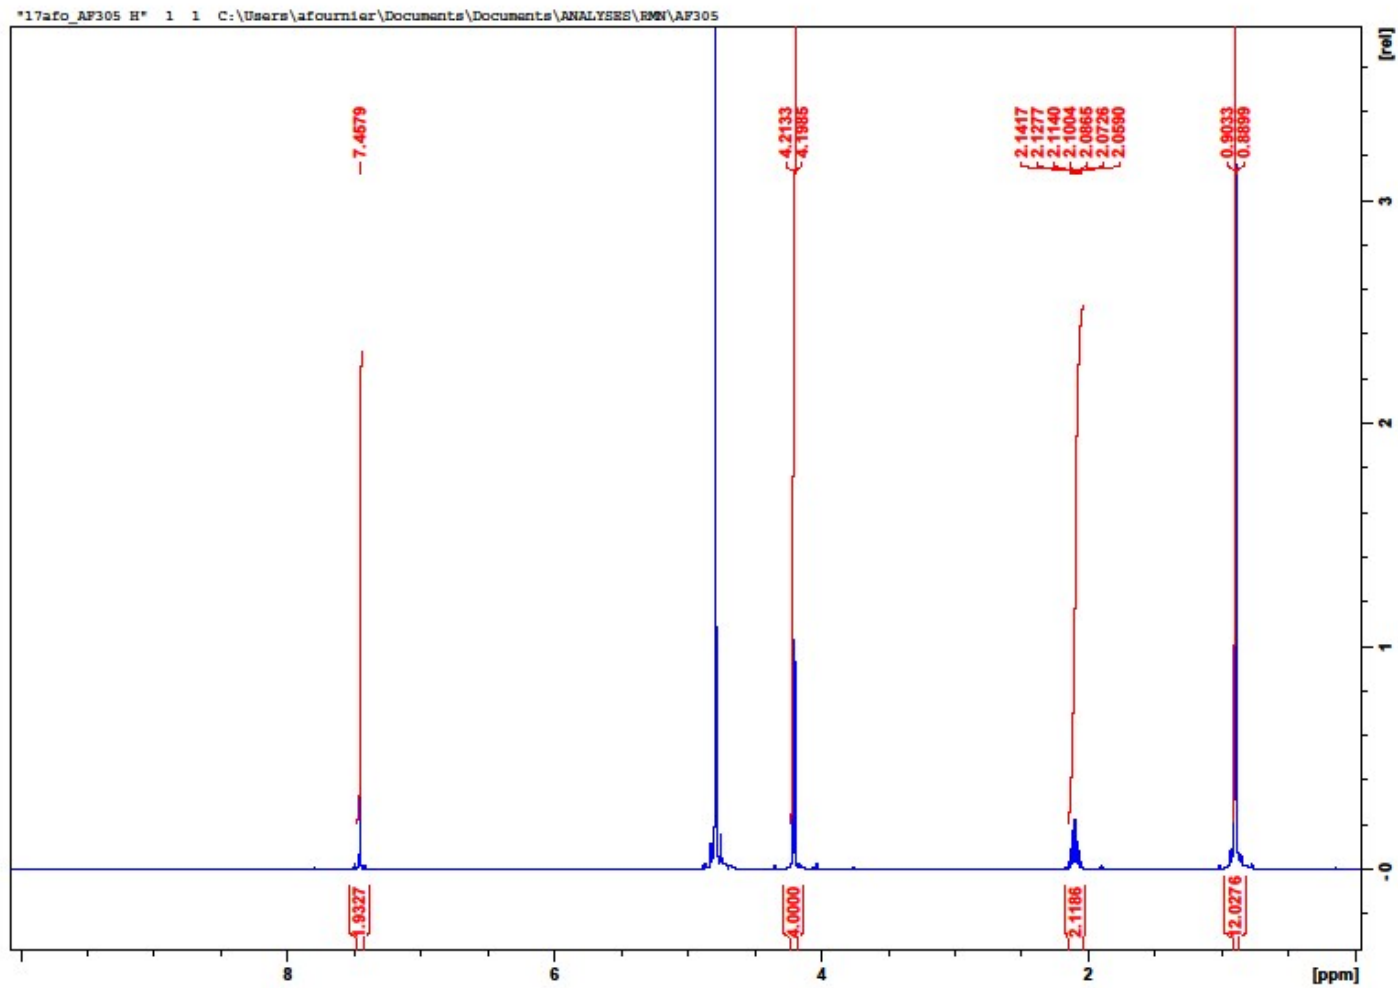

\*17afo\_AF305 C\* 1 1 C:\Users\afournier\Documents\Documents\ANALYSES\RMN\AF305

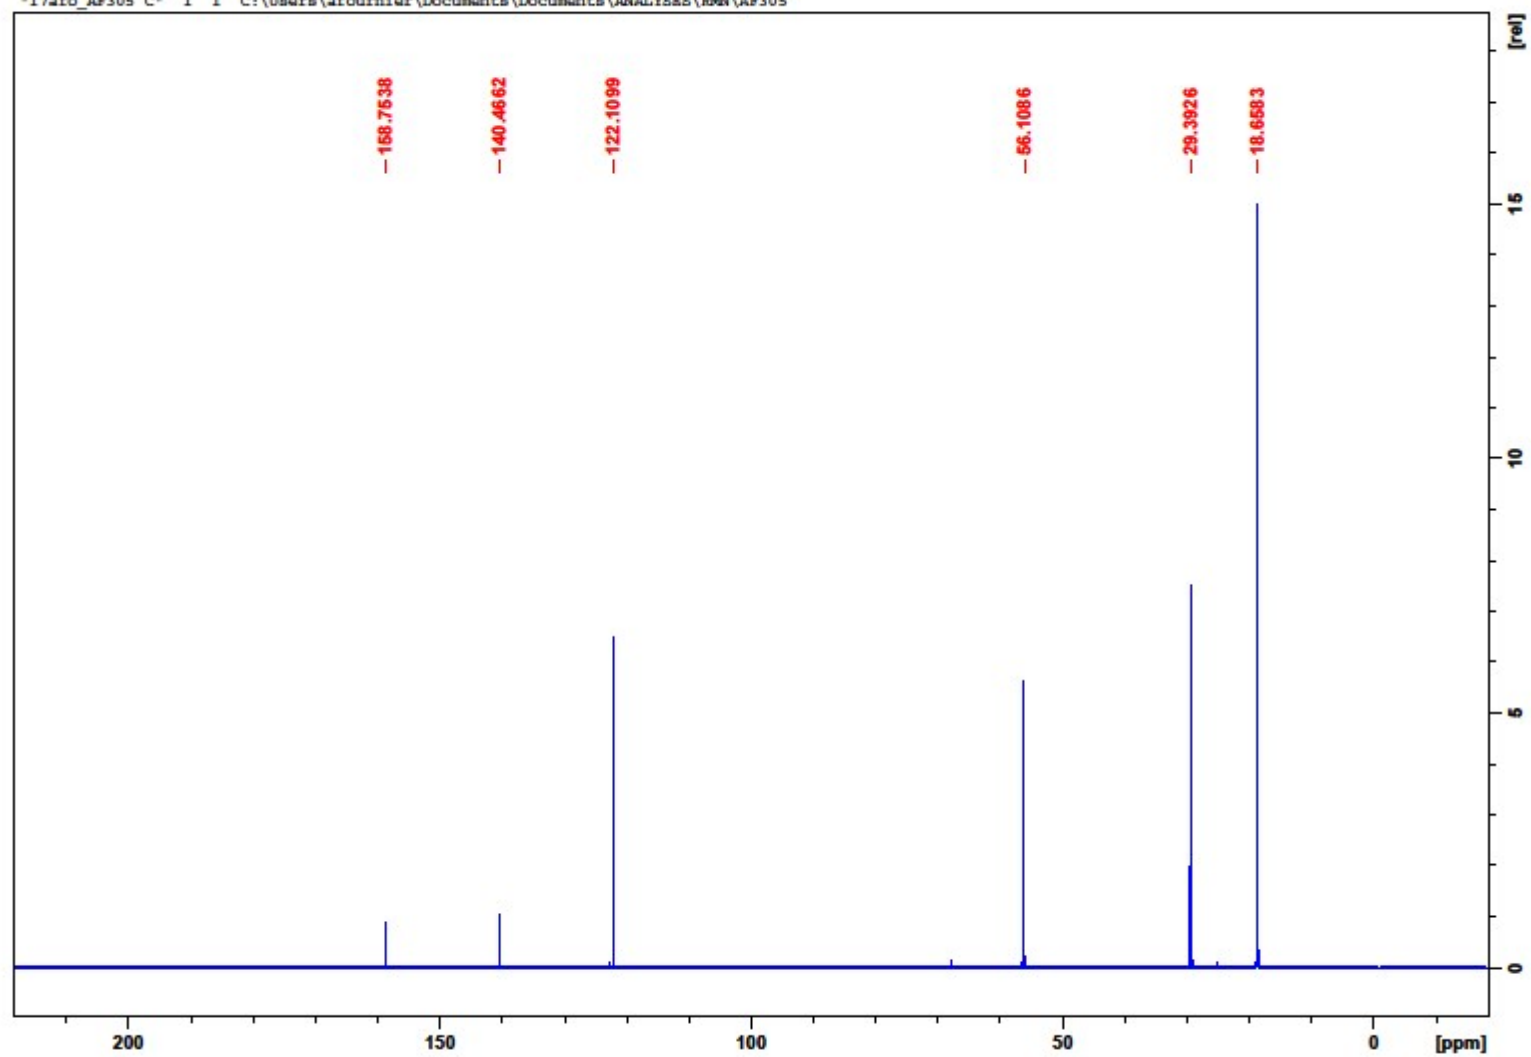

[iBu<sub>2</sub>IM](OAc)

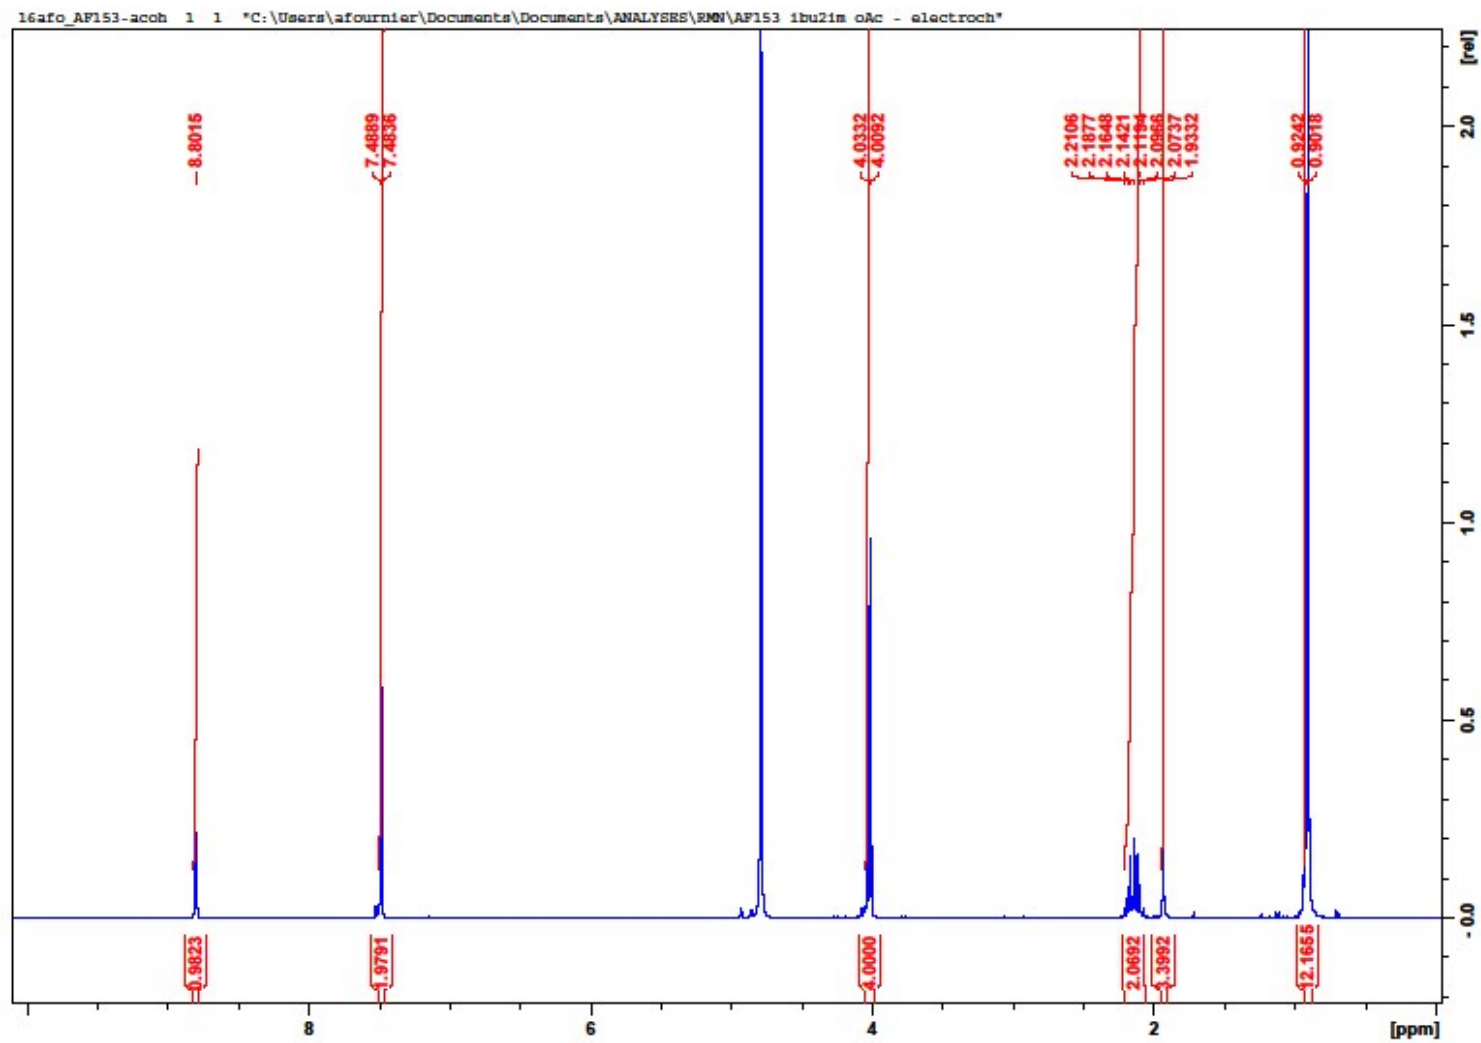

16af0\_AF153-acoh 2 1 \*C:\Users\afournier\Documents\Documents\ANALYSES\RMN\AF153 Ibu2in oAc - electroch\*

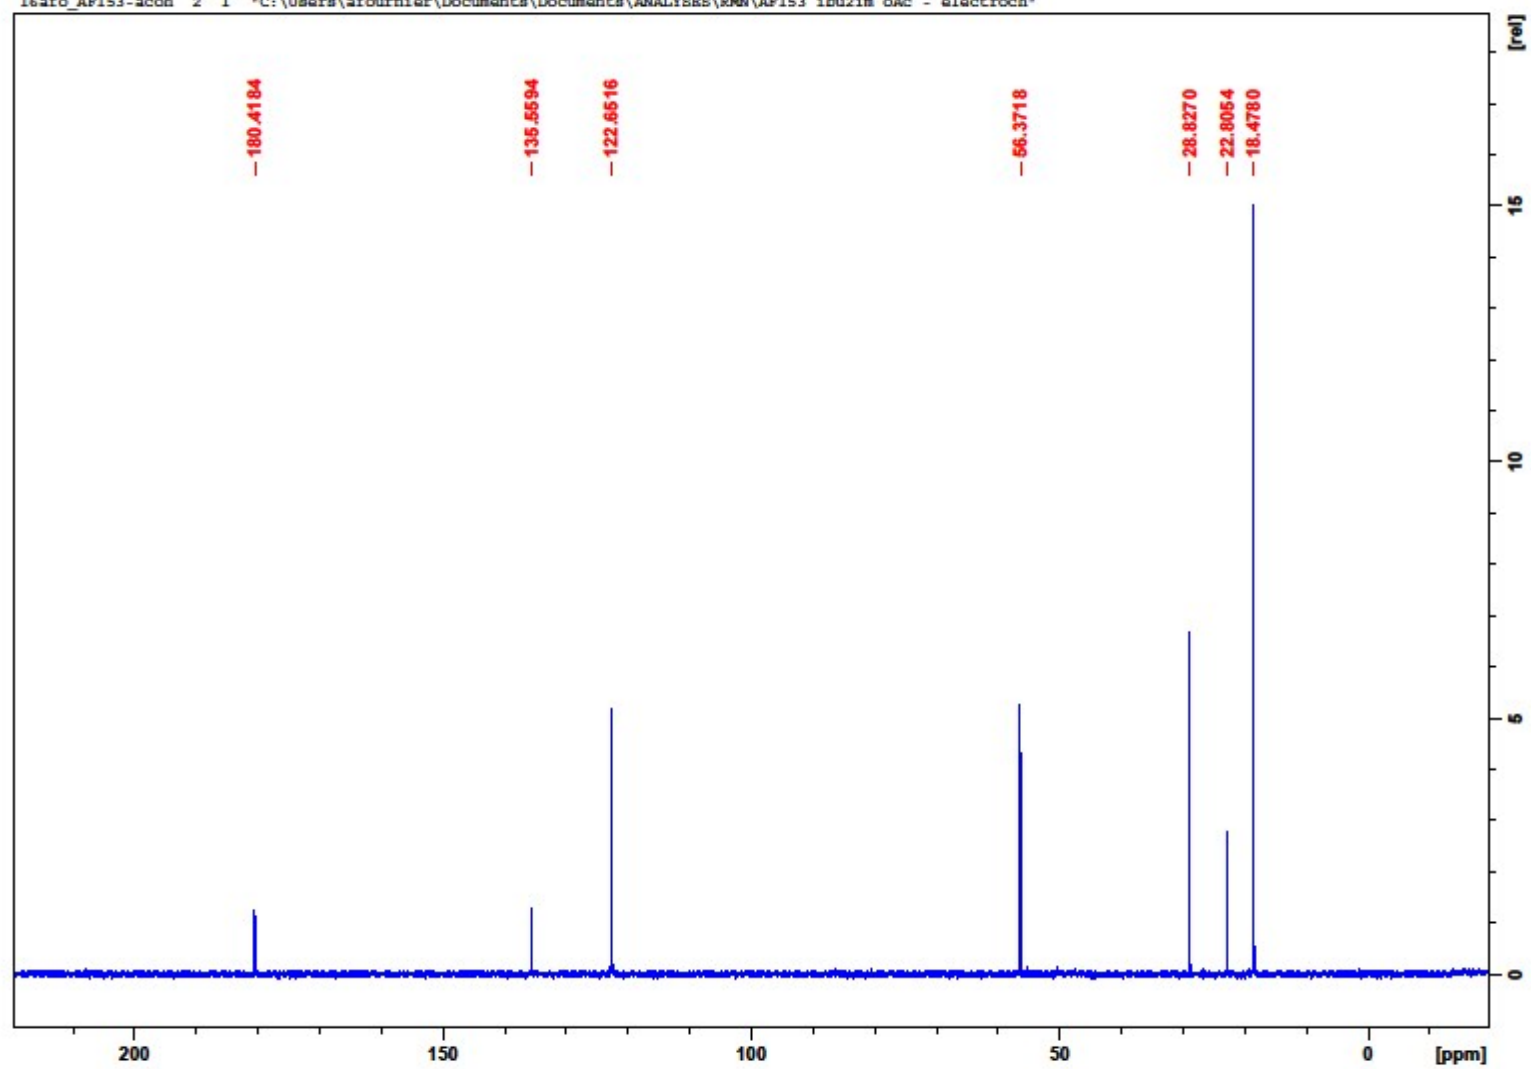

## Experiments of CO<sub>2</sub> chemisorption with *i*Bu<sub>2</sub>IM](OAc)

Before CO<sub>2</sub> bubbling

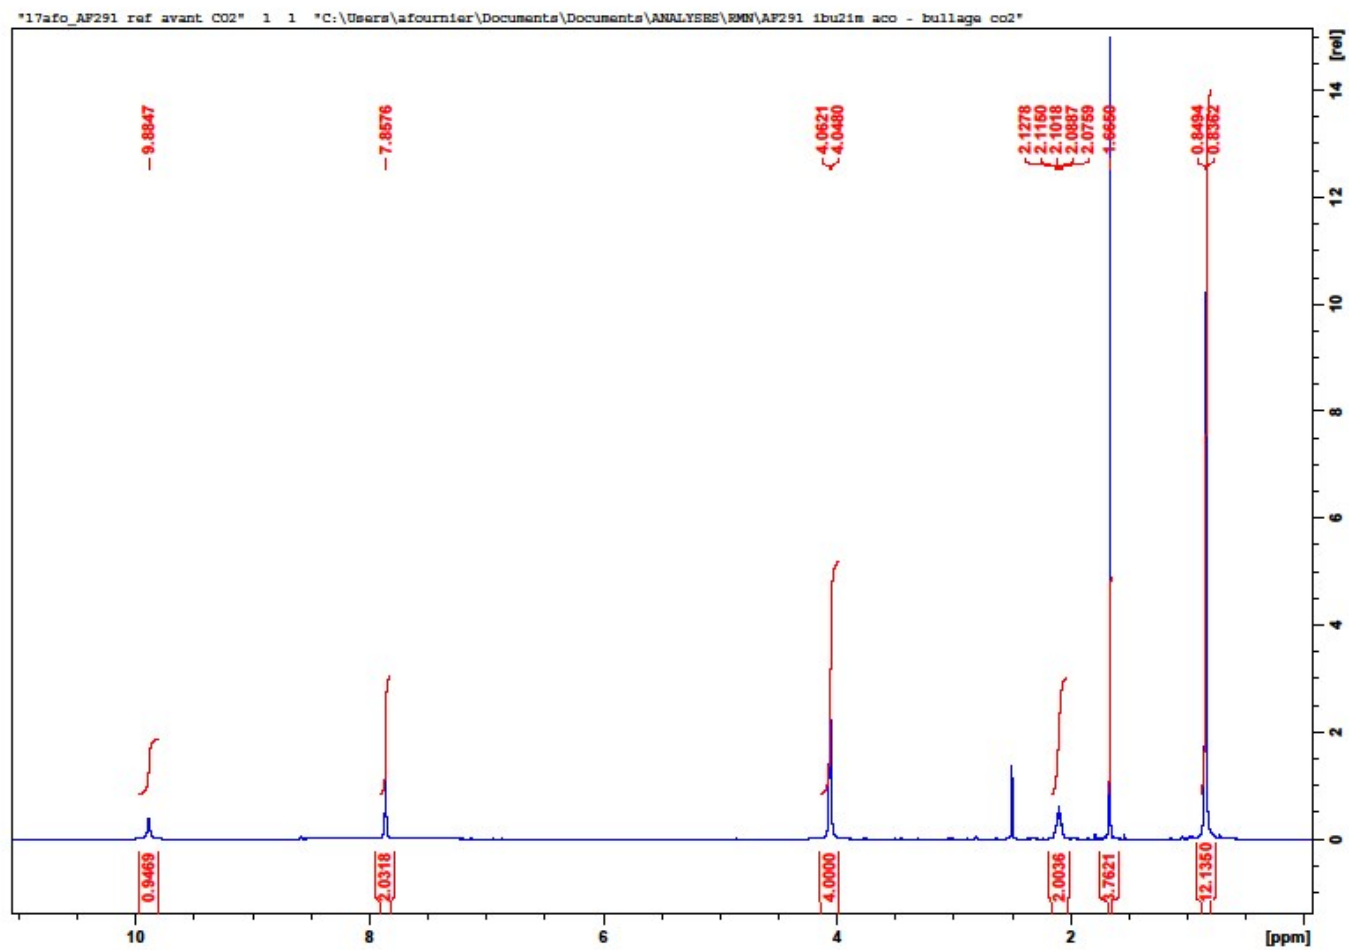

"17afo\_AF291 ref avant CO2" 2 1 "C:\Users\afournier\Documents\Documents\ANALYSES\EMN\AF291 1bu21m acc - bullage co2"

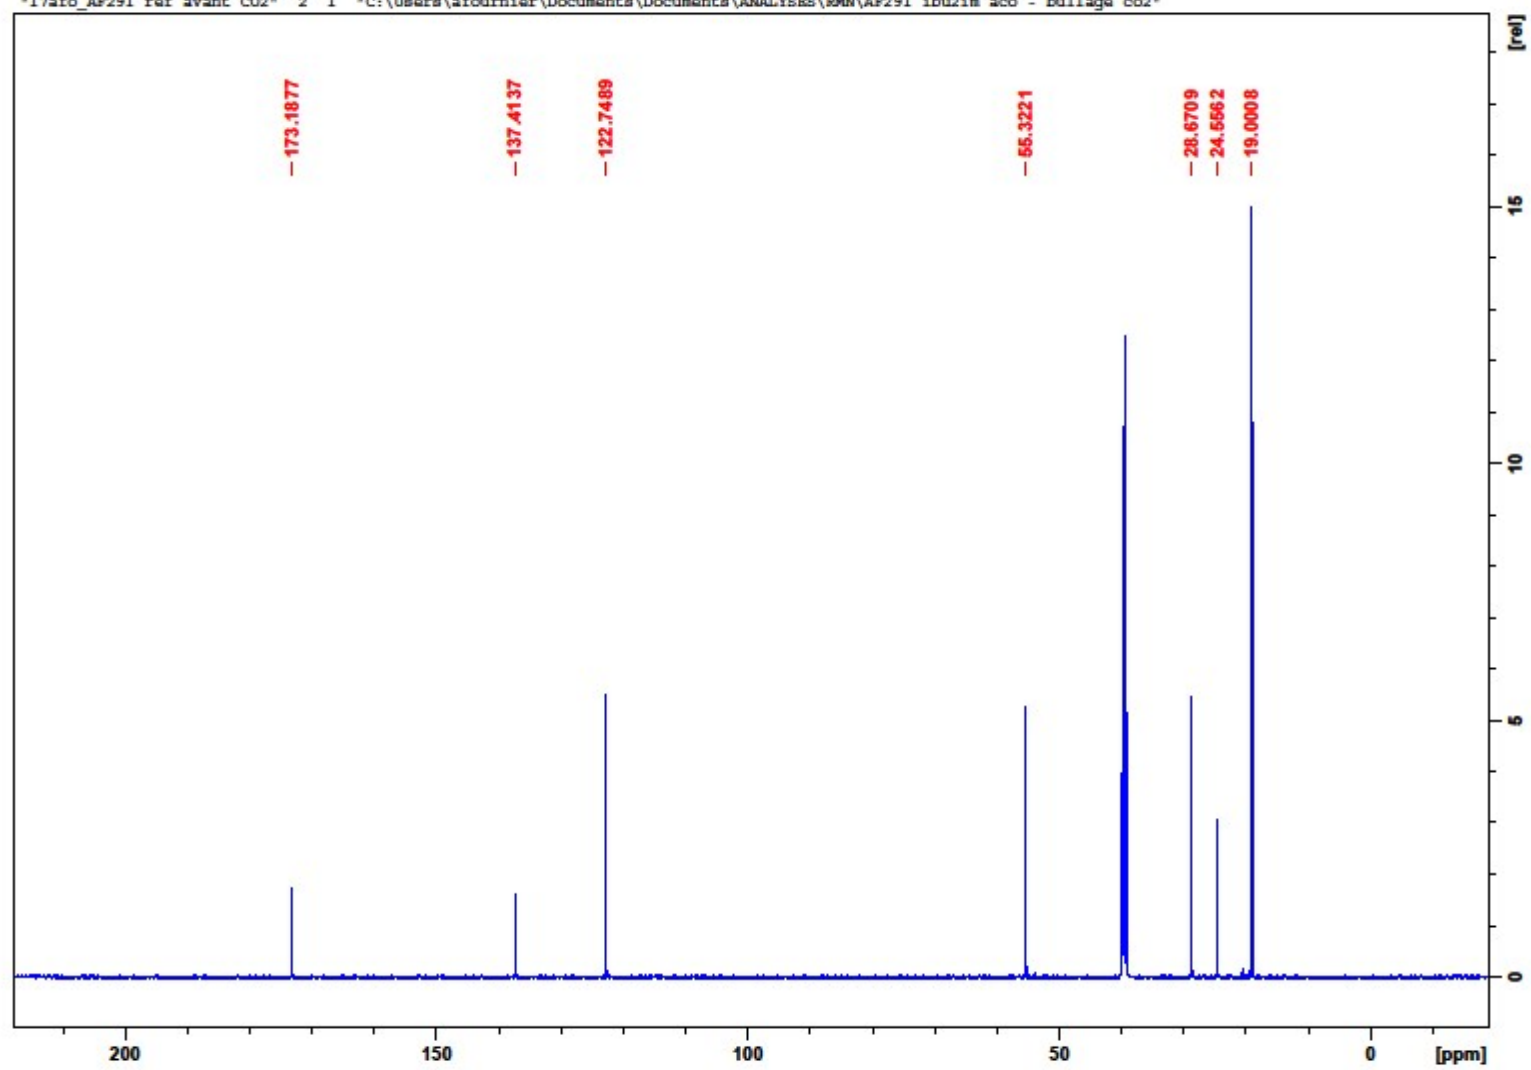

# After CO<sub>2</sub> bubbling

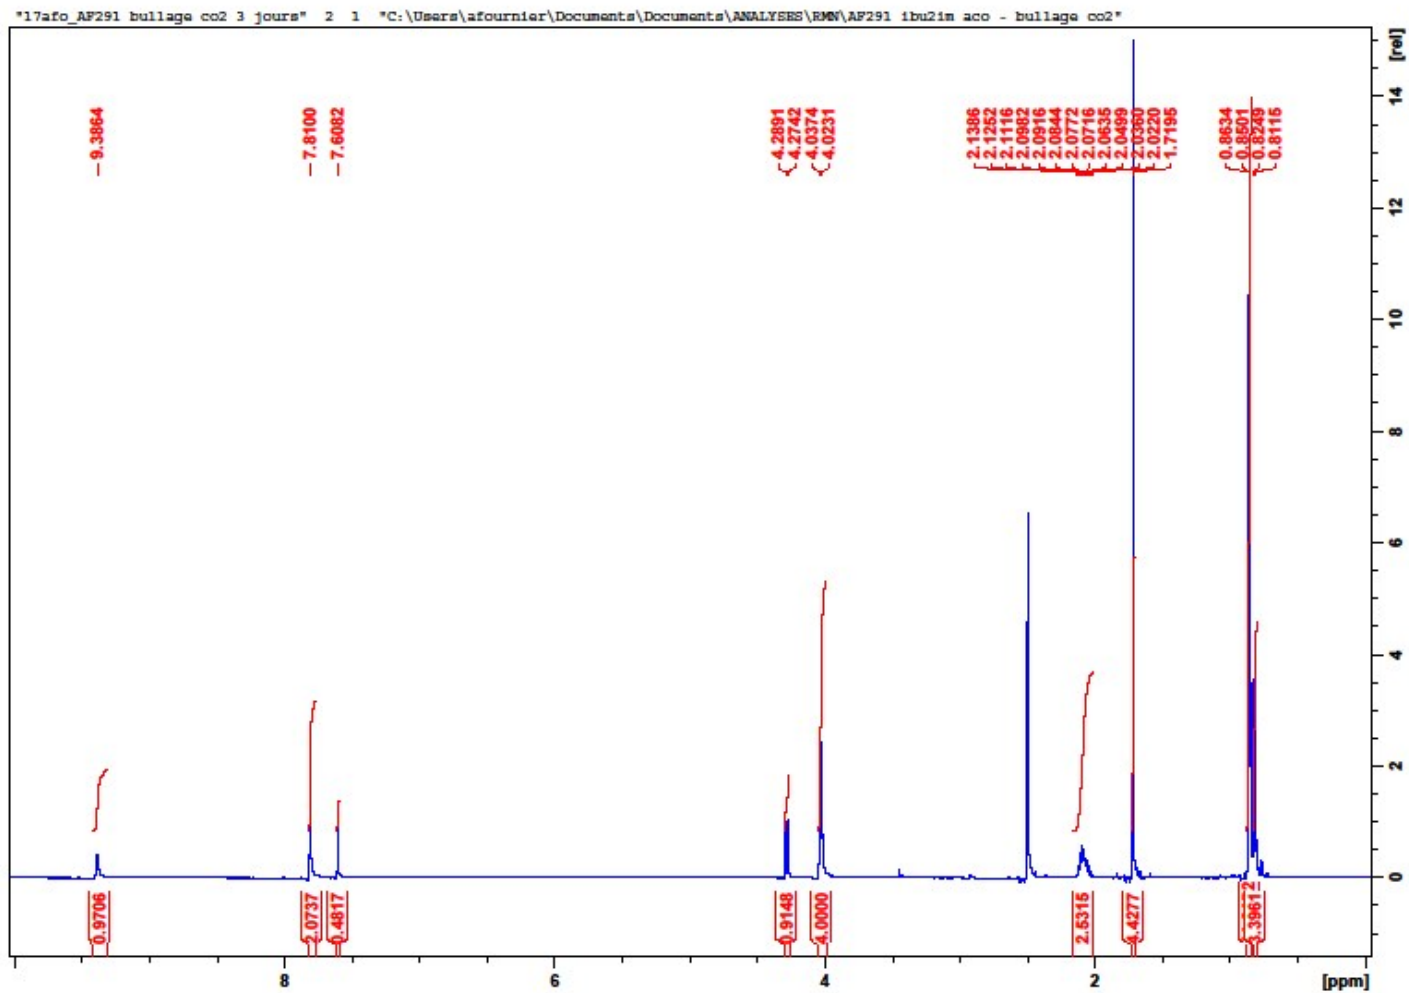

"17af0\_AF291 bullage co2 3 jours" 1 1 "C:\Users\afournier\Documents\Documents\ANALYSES\RMN\AF291 ibu2in acc - bullage co2"

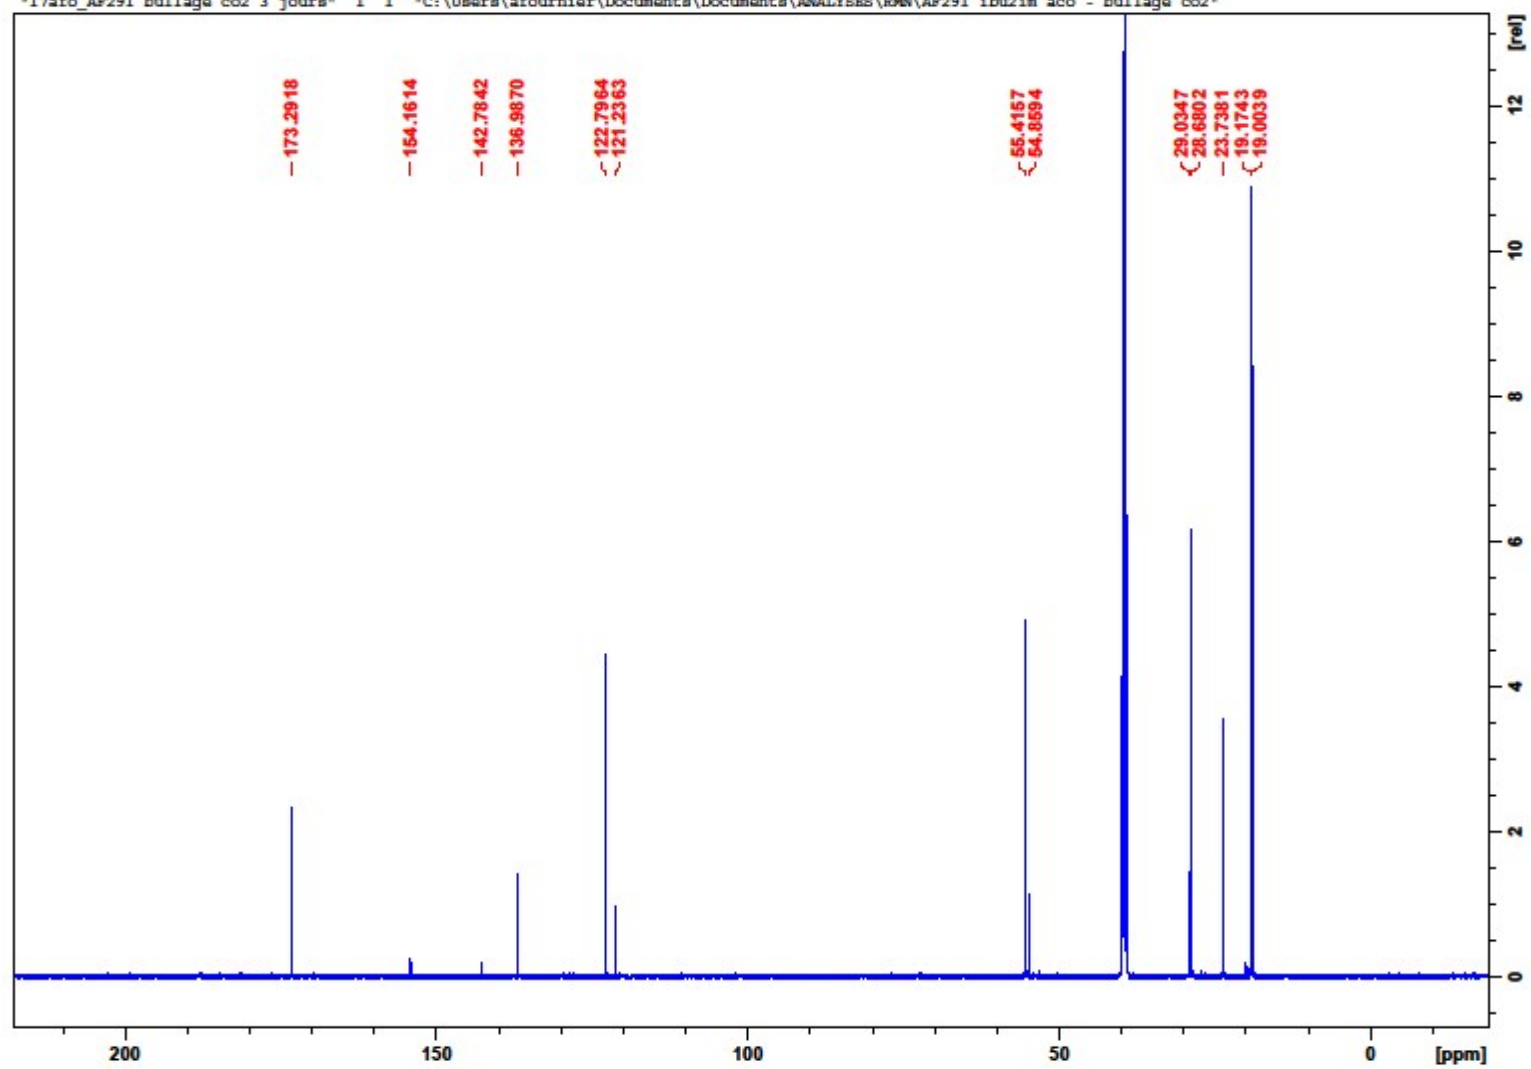



# NMR sample open air

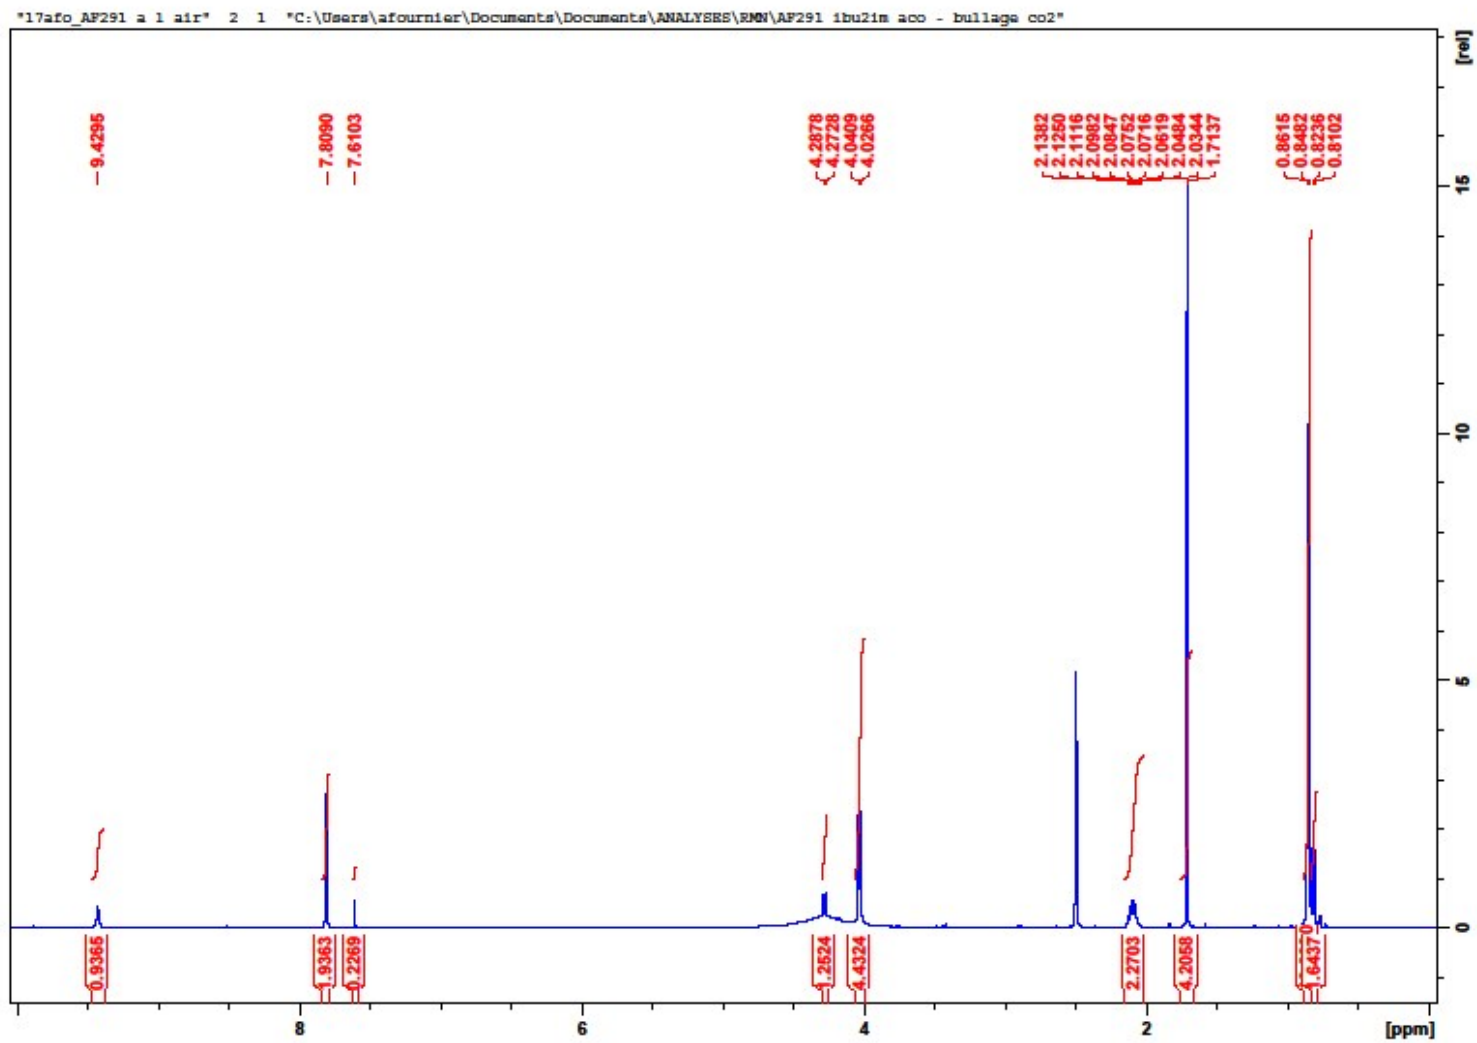

"17afo\_AF291 a 1 air" 1 1 "C:\Users\afournier\Documents\Documents\ANALYSES\RMN\AF291 ibu2im acc - bullage co2"

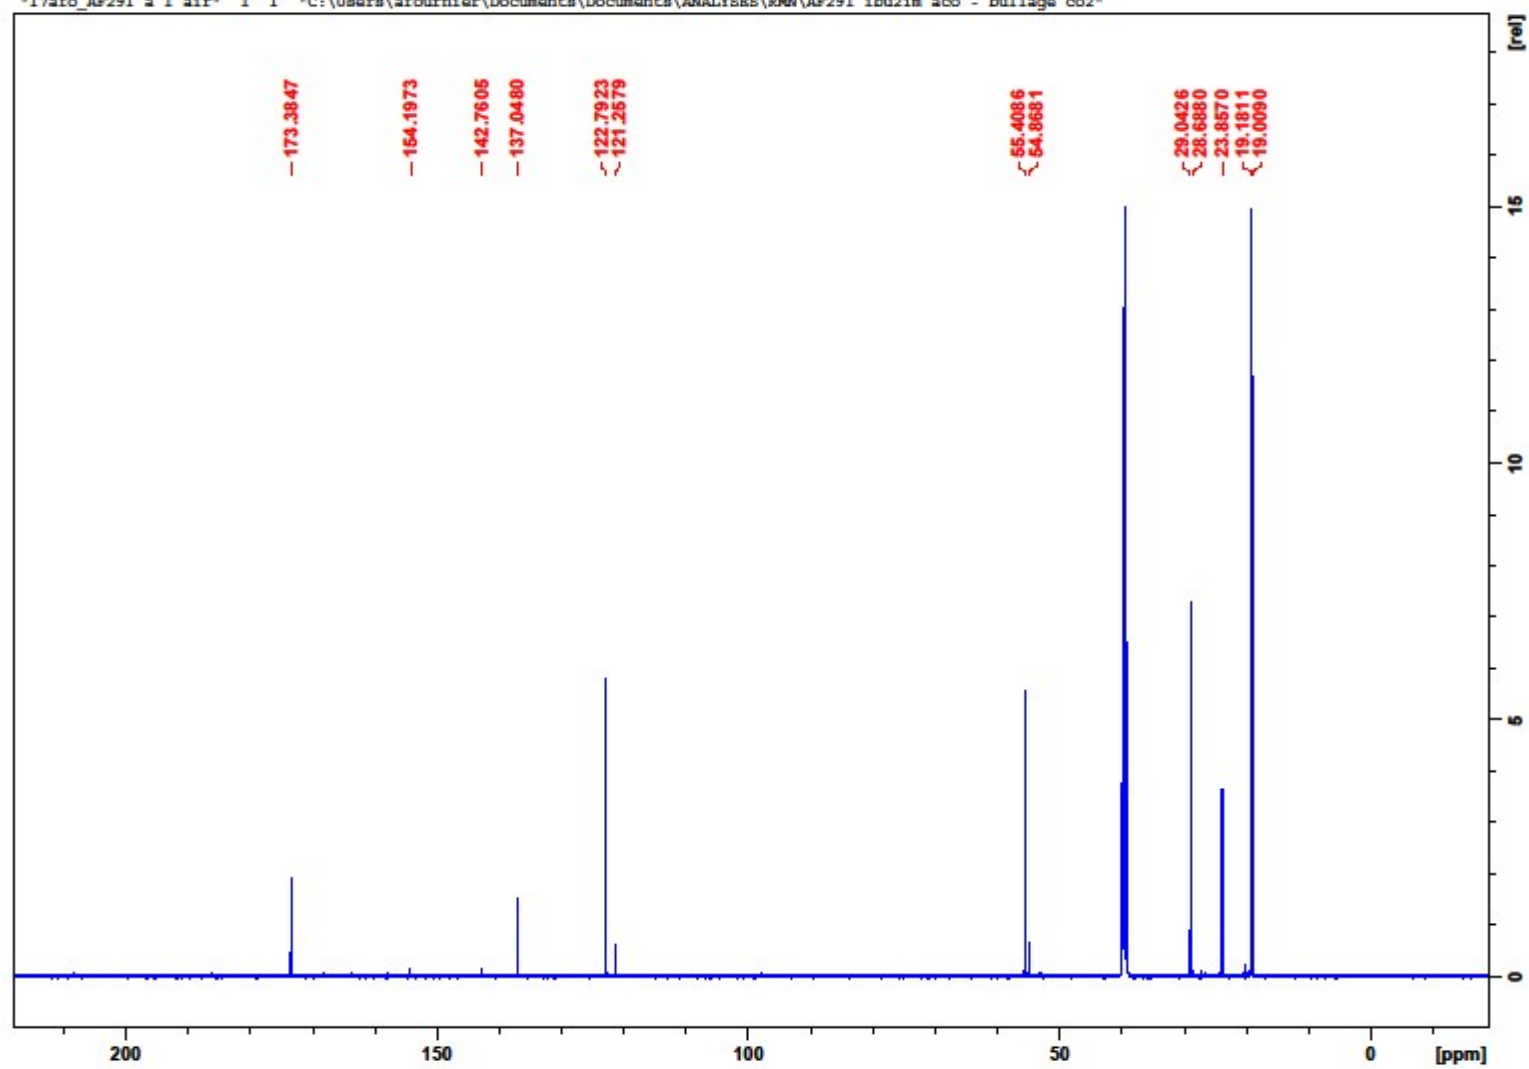

After addition of D<sub>2</sub>O

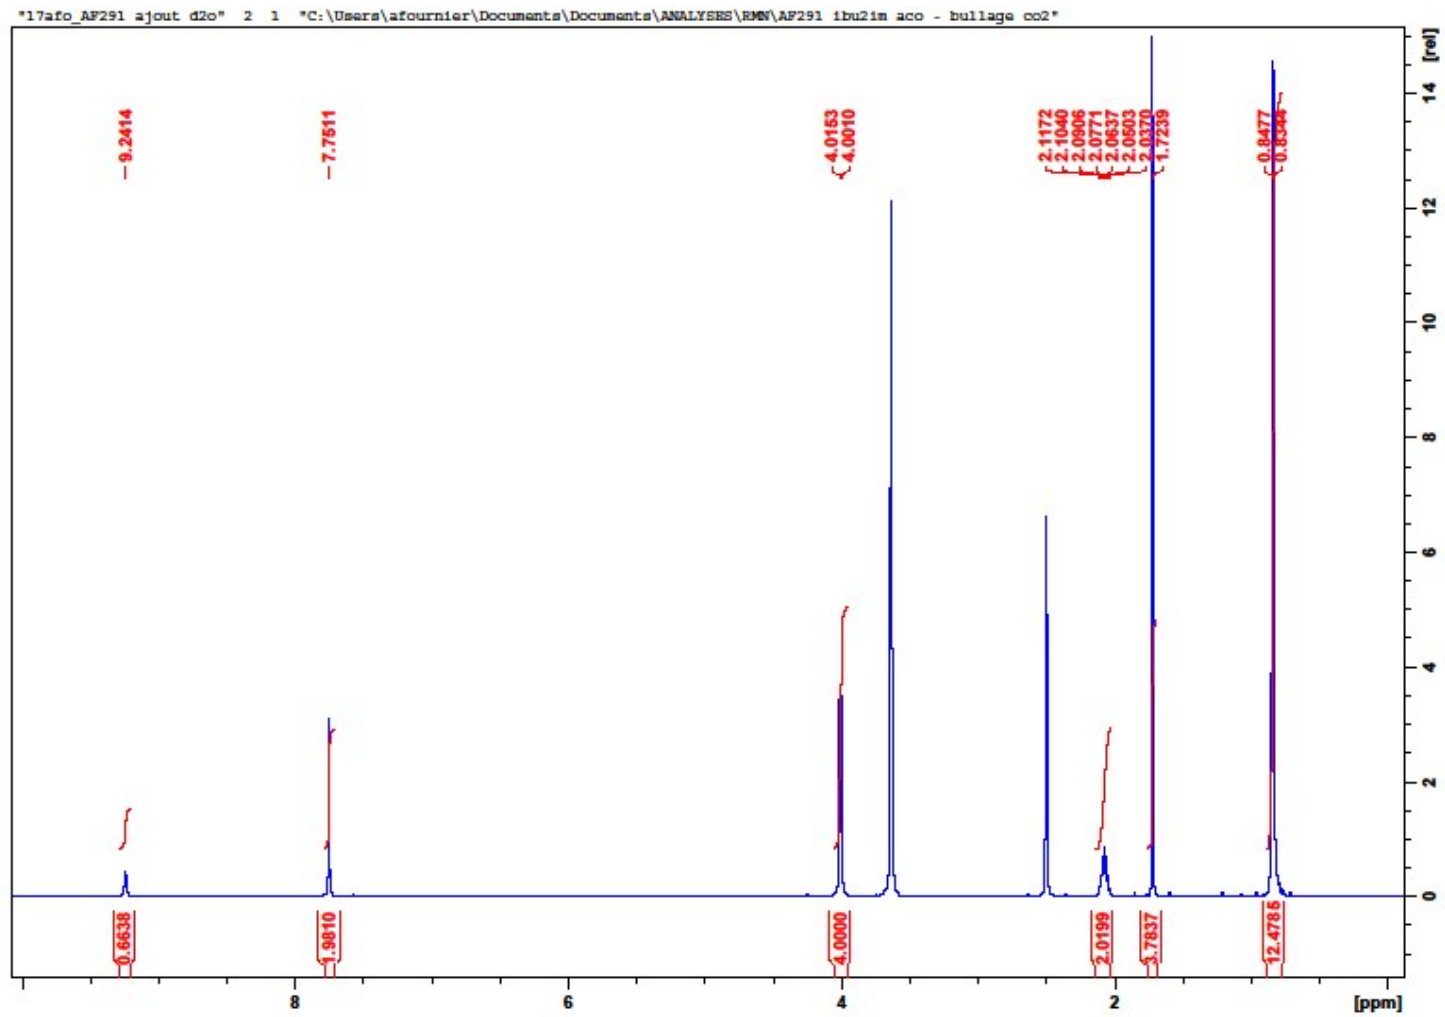

"17af0\_AF291 ajout d2o" 1 1 "C:\Users\afournier\Documents\Documents\ANALYSES\RMN\AF291 ibu2in aco - bullage co2"

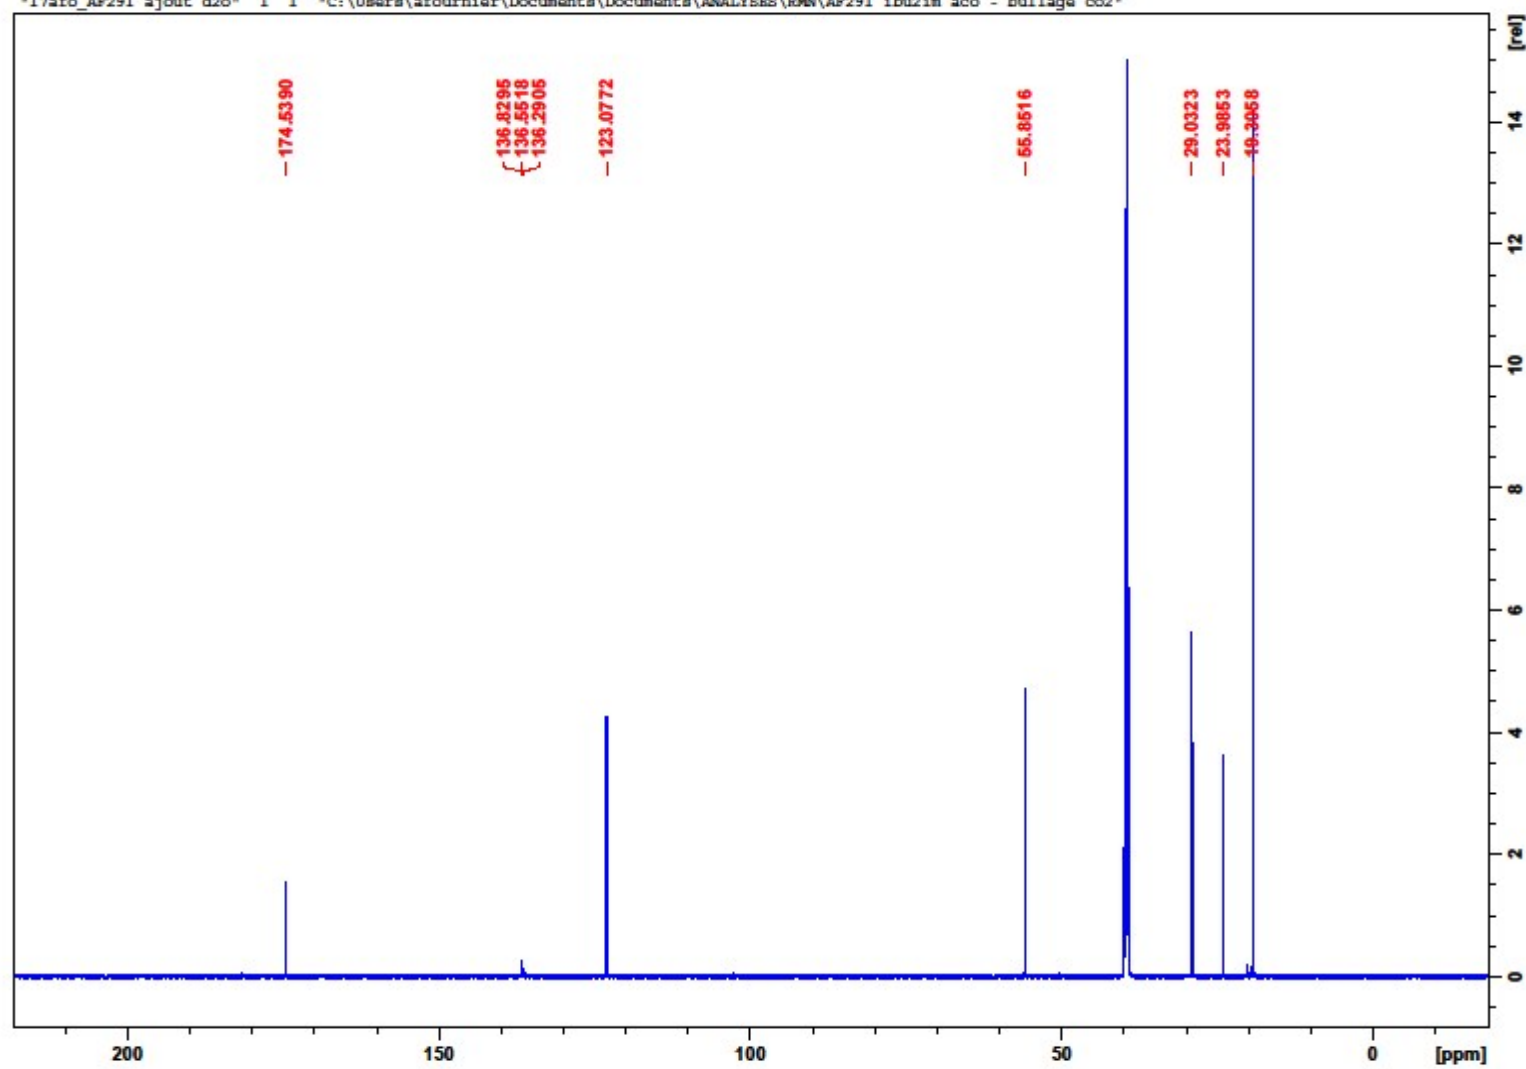

## Experiments of CO<sub>2</sub> chemisorption with [iBu<sub>2</sub>IM](HC<sub>2</sub>O<sub>4</sub>):

Before CO<sub>2</sub> bubbling:

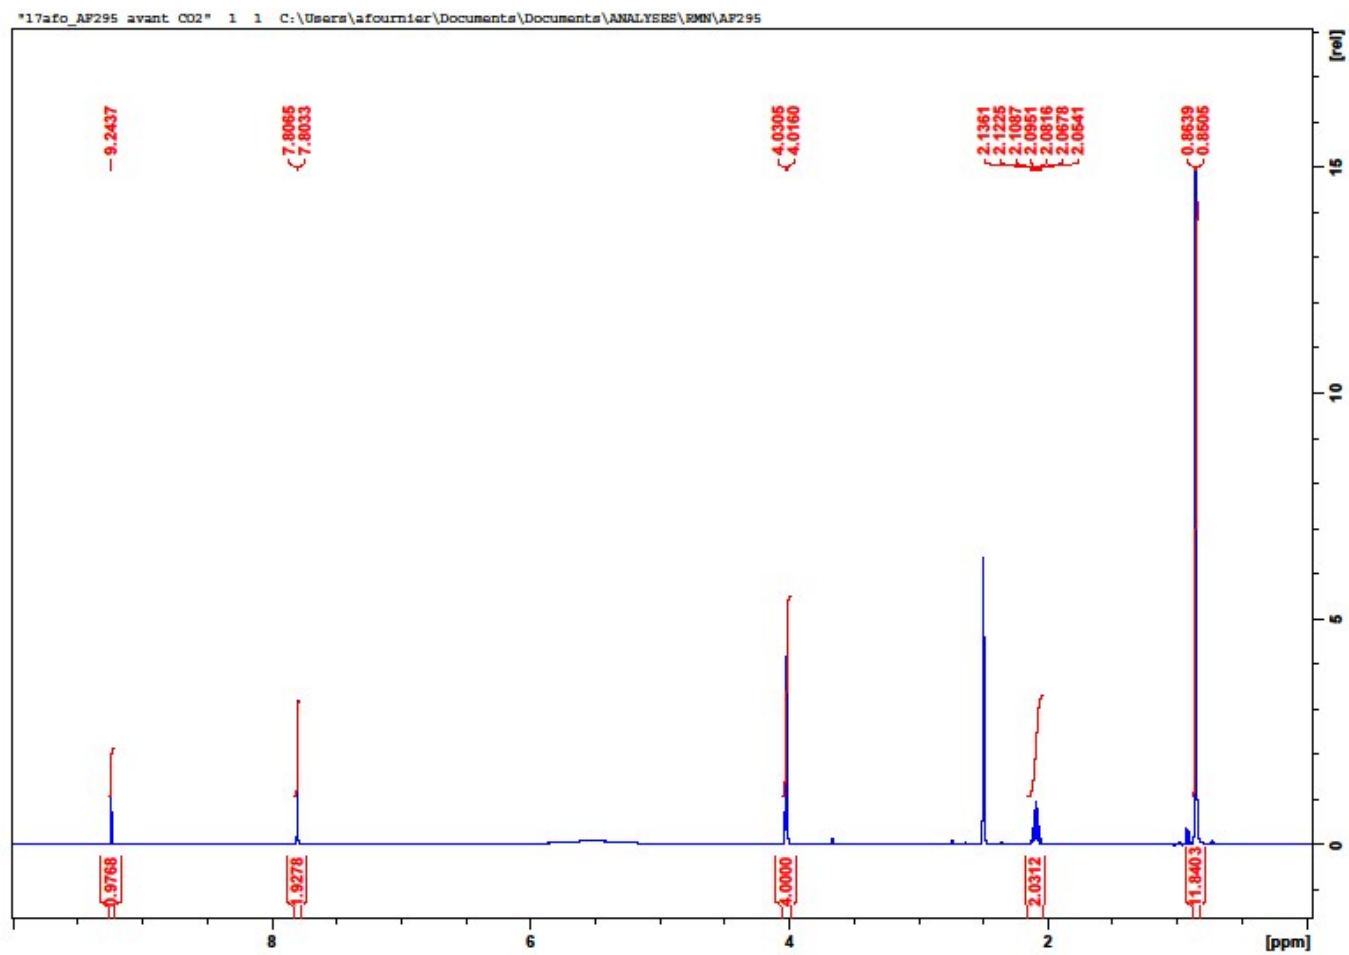

After CO<sub>2</sub> bubbling:

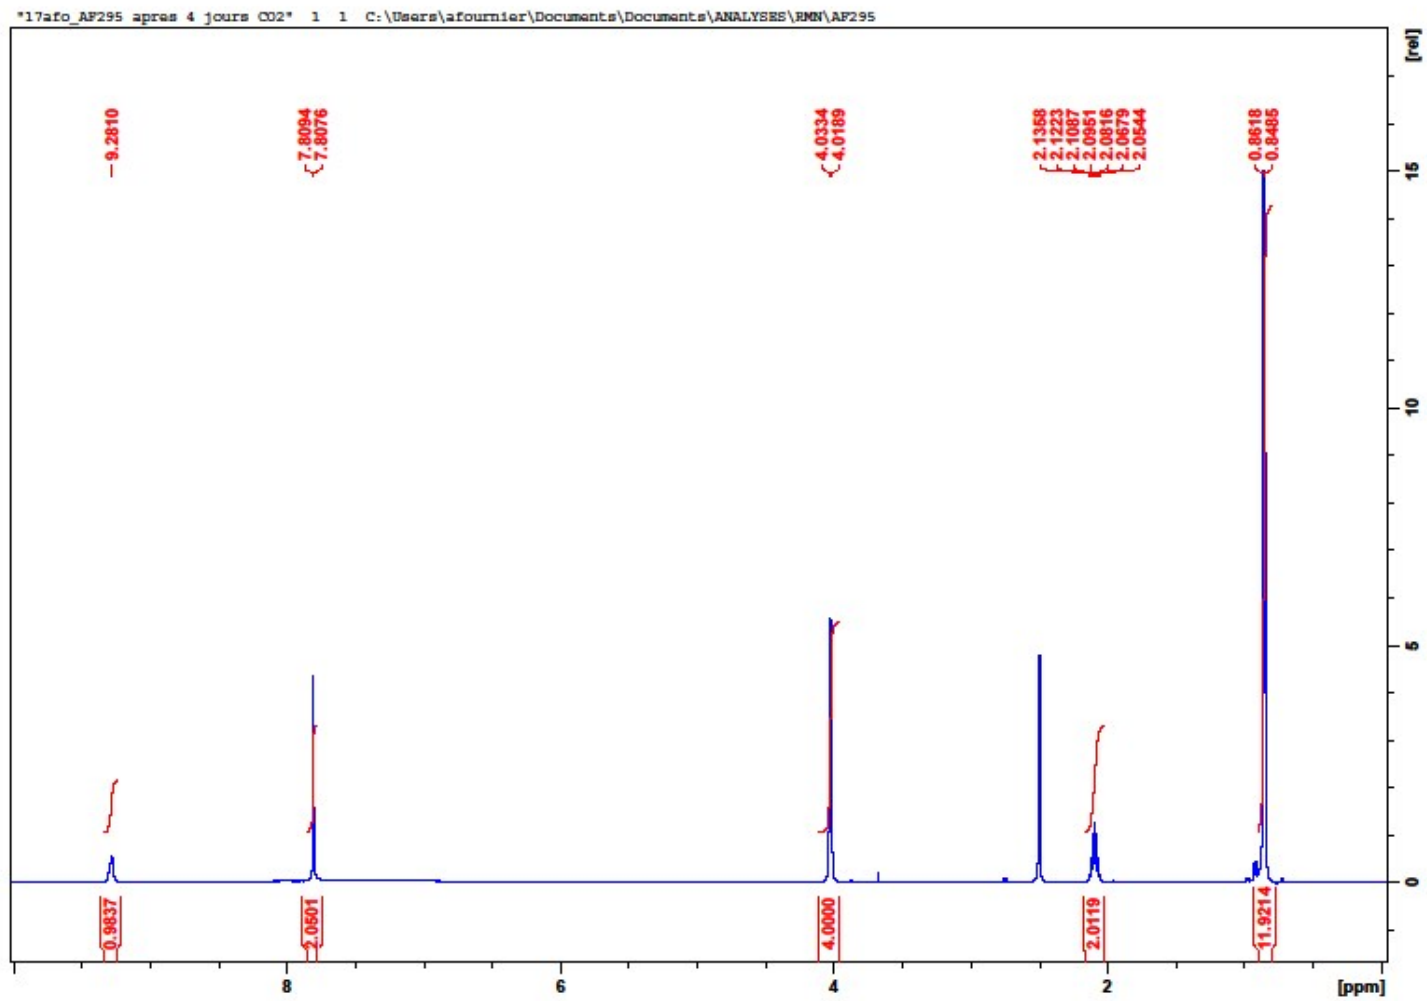

Supplement: c7gc02167d1.pdf [file c7gc02167d1.pdf]
